# Supplementary material for: THE ELLIPTIC REPRESENTATION OF THE SIXTH PAINLEV´ E EQUATION
Source: PeerJ journal article supplement (doi:10.7717/peerj.2833), 2004-01-01
Supplement: Lewin_Supplemental_Table_S1.pdf [file Lewin_Supplemental_Table_S1.pdf]

**Table S1.** The 334 substrates showing negative reaction in all the ten MAH isolates tested, listed by PM plates.

**PM1**

**Carbon substrates**

- 1,"A03 (N-Acetyl-D-Glucosamine)"
- 2,"A04 (D-Saccharic Acid)"
- 3,"A05 (Succinic Acid)"
- 4,"A06 (D-Galactose)"
- 5,"A07 (L-Aspartic Acid)"
- 6,"A08 (L-Proline)"
- 7,"A09 (D-Alanine)"
- 8,"A10 (D-Trehalose)"
- 9,"A11 (D-Mannose)"
- 10,"A12 (Dulcitol)"
- 11,"B01 (D-Serine)"
- 12,"B02 (D-Sorbitol)"
- 13,"B03 (Glycerol)"
- 14,"B04 (L-Fucose)"
- 15,"B05 (D-Glucuronic Acid)"
- 16,"B06 (D-Gluconic Acid)"
- 17,"B07 (D,L-a-Glycerol-Phosphate)"
- 18,"B09 (L-Lactic Acid)"
- 19,"B10 (Sodium Formate)"
- 20,"B11 (D-Mannitol)"
- 21,"B12 (L-Glutamic Acid)"
- 22,"C01 (D-Glucose-6-Phosphate)"
- 23,"C02 (D-Galactonic Acid-g-Lactone)"
- 24,"C03 (D,L-Malic Acid)"
- 25,"C07 (D-Fructose)"
- 26,"C09 (D-Glucose)"
- 27,"C10 (D-Maltose)"
- 28,"C11 (D-Melibiose)"
- 29,"C12 (Thymidine)"
- 30,"D01 (L-Asparagine)"
- 31,"D02 (D-Aspartic Acid)"
- 32,"D03 (D-Glucosaminic Acid)"
- 33,"D04 (1,2-Propanediol)"
- 34,"D06 (a-Keto-Glutaric Acid)"
- 35,"D07 (a-Keto-Butyric Acid)"
- 36,"D08 (a-Methyl-D-Galactoside)"
- 37,"D09 (a-D-Lactose)"
- 38,"D10 (Lactulose)"
- 39,"D11 (Sucrose)"
- 40,"D12 (Uridine)"
- 41,"E01 (L-Glutamine)"
- 42,"E02 (m-Tartaric Acid)"
- 43,"E03 (a-D-Glucose-1-Phosphate)"
- 44,"E06 (a-Hydroxy-Glutaric Acid-g-Lactone)"

45,"E07 (a-Hydroxy-Butyric Acid)"  
46,"E08 (b-Methyl-D-Glucoside)"  
47,"E09 (Adonitol)"  
48,"E10 (Maltotriose)"  
49,"E11 (2'-Deoxy-Adenosine)"  
50,"E12 (Adenosine)"  
51,"F01 (Gly-Asp)"  
52,"F02 (Citric Acid)"  
53,"F03 (myo-Inositol)"  
54,"F04 (D-Threonine)"  
55,"F05 (Fumaric Acid)"  
56,"F06 (Bromo-Succinic Acid)"  
57,"F08 (Mucic Acid)"  
58,"F09 (Glycolic Acid)"  
59,"F10 (Glyoxylic Acid)"  
60,"F11 (D-Cellobiose)"  
61,"F12 (Inosine).x"  
62,"G01 (Gly-Glu)"  
63,"G02 (Tricarballic Acid)"  
64,"G03 (L-Serine)"  
65,"G04 (L-Threonine)"  
66,"G05 (L-Alanine)"  
67,"G06 (Ala-Gly)"  
68,"G08 (N-Acetyl-b-D-Mannosamine)"  
69,"G11 (D-Malic Acid)"  
70,"G12 (L-Malic Acid)"  
71,"H01 (Gly-Pro)"  
72,"H02 (p-Hydroxy-Phenylacetic Acid)"  
73,"H03 (m-Hydroxy-Phenylacetic Acid)"  
74,"H04 (Tyramine)"  
75,"H07 (Glucuronamide)"  
76,"H09 (L-Galactonic Acid-g-Lactone)"  
77,"H10 (D-Galacturonic Acid)"  
78,"H11 (b-Phenylethylamine)"  
79,"H12 (Ethanolamine)"

## **PM2**

### **Carbon substrates**

80,"A02 (Chondroitin Sulfate C)"  
81,"A03 (a-Cyclodextrin)"  
82,"A04 (b-Cyclodextrin)"  
83,"A05 (g-Cyclodextrin)"  
84,"A06 (Dextrin)"  
85,"A07 (Gelatin)"  
86,"A08 (Glycogen)"  
87,"A09 (Inulin)"  
88,"A10 (Laminarin)"  
89,"A11 (Mannan)"  
90,"A12 (Pectin)"  
91,"B01 (N-Acetyl-D-Galactosamine)"  
92,"B02 (N-Acetyl-Neuraminic Acid)"

93,"B03 (b-D-Allose)"  
94,"B04 (Amygdalin)"  
95,"B06 (D-Arabitol)"  
96,"B07 (L-Arabitol)"  
97,"B08 (Arbutin)"  
98,"B10 (m-Erythritol)"  
99,"B11 (D-Fucose)"  
100,"C01 (b-Gentiobiose)"  
101,"C02 (L-Glucose)"  
102,"C03 (D-Lactitol)"  
103,"C04 (D-Melezitose)"  
104,"C05 (Maltitol)"  
105,"C06 (a-Methyl-D-Glucoside)"  
106,"C08 (3-O-Methyl-D-Glucose)"  
107,"C09 (b-Methyl-D-Glucuronic Acid)"  
108,"C10 (a-Methyl-D-Mannoside)"  
109,"C11 (b-Methyl-D-Xylopyranoside)"  
110,"D01 (D-Raffinose)"  
111,"D02 (D-Salicin)"  
112,"D03 (Sedoheptulosan)"  
113,"D05 (Stachyose)"  
114,"D07 (Turanose)"  
115,"D08 (Xylitol)"  
116,"D09 (N-Acetyl-D-Glucosaminitol)"  
117,"D10 (g-Amino-n-Butyric Acid)"  
118,"D11 (d-Amino-Valeric Acid)"  
119,"E01 (Capric Acid)"  
120,"E03 (Citraconic Acid)"  
121,"E04 (D-Citramalic Acid)"  
122,"E06 (2-Hydroxy-Benzoic Acid)"  
123,"E07 (4-Hydroxy-Benzoic Acid)"  
124,"E08 (b-Hydroxy-Butyric Acid)"  
125,"E10 (a-Keto-Valeric Acid)"  
126,"E11 (Itaconic Acid)"  
127,"F01 (D-Lactic Acid Methyl Ester)"  
128,"F02 (Malonic Acid)"  
129,"F03 (Melibionc Acid)"  
130,"F04 (Oxalic Acid)"  
131,"F06 (Quinic Acid)"  
132,"F07 (D-Ribono-1,4-Lactone)"  
133,"F10 (Succinamic Acid)"  
134,"F11 (D-Tartaric Acid)"  
135,"F12 (L-Tartaric Acid)"  
136,"G01 (Acetamide)"  
137,"G03 (N-Acetyl-L-Glutamic Acid)"  
138,"G04 (L-Arginine)"  
139,"G05 (Glycine)"  
140,"G07 (L-Homoserine)"  
141,"G08 (L-Hydroxyproline)"  
142,"G09 (L-Isoleucine)"

143,"G10 (L-Leucine)"  
144,"G11 (L-Lysine)"  
145,"G12 (L-Methionine)"  
146,"H01 (L-Ornithine)"  
147,"H02 (L-Phenylalanine)"  
148,"H03 (L-Pyroglutamic Acid)"  
149,"H04 (L-Valine)"  
150,"H05 (D,L-Carnitine)"  
151,"H06 (Butylamine [sec])"  
152,"H07 (D,L-Octopamine)"  
153,"H08 (Putrescine)"  
154,"H10 (2,3-Butanediol)"  
155,"H12 (3-Hydroxy-2-Butanone)"

### **PM3**

#### **Nitrogen substrates**

156,"A02 (Ammonia)"  
157,"A03 (Sodium Nitrite)"  
158,"A04 (Sodium Nitrate)"  
159,"A05 (Urea)"  
160,"A06 (Biuret)"  
161,"A07 (L-Alanine)"  
162,"A08 (L-Arginine)"  
163,"A09 (L-Asparagine)"  
164,"A10 (L-Aspartic Acid)"  
165,"A12 (L-Glutamic Acid)"  
166,"B01 (L-Glutamine)"  
167,"B02 (Glycine)"  
168,"B03 (L-Histidine)"  
169,"B04 (L-Isoleucine)"  
170,"B05 (L-Leucine)"  
171,"B06 (L-Lysine)"  
172,"B07 (L-Methionine)"  
173,"B08 (L-Phenylalanine)"  
174,"B09 (L-Proline)"  
175,"B10 (L-Serine)"  
176,"B11 (L-Threonine)"  
177,"B12 (L-Tryptophan)"  
178,"C01 (L-Tyrosine)"  
179,"C02 (L-Valine)"  
180,"C03 (D-Alanine)"  
181,"C04 (D-Asparagine)"  
182,"C05 (D-Aspartic Acid)"  
183,"C06 (D-Glutamic Acid)"  
184,"C07 (D-Lysine)"  
185,"C08 (D-Serine)"  
186,"C09 (D-Valine)"  
187,"C10 (L-Citrulline)"  
188,"C11 (L-Homoserine)"  
189,"C12 (L-Ornithine)"  
190,"D01 (N-Acetyl-L-Glutamic Acid)"

191,"D02 (N-Phthaloyl-L-Glutamic Acid)"  
192,"D03 (L-Pyroglutamic Acid)"  
193,"D04 (Hydroxylamine)"  
194,"D05 (Methylamine)"  
195,"D06 (N-Amylamine)"  
196,"D07 (N-Butylamine)"  
197,"D08 (Ethylamine)"  
198,"D09 (Ethanolamine)"  
199,"D11 (Putrescine)"  
200,"D12 (Agmatine)"  
201,"E01 (Histamine)"  
202,"E02 (b-Phenylethylamine)"  
203,"E03 (Tyramine)"  
204,"E04 (Acetamide)"  
205,"E05 (Formamide)"  
206,"E06 (Glucuronamide)"  
207,"E07 (D,L-Lactamide)"  
208,"E08 (D-Glucosamine)"  
209,"E11 (N-Acetyl-D-Glucosamine)"  
210,"E12 (N-Acetyl-D-Galactosamine)"  
211,"F01 (N-Acetyl-b-D-Mannosamine)"  
212,"F02 (Adenine)"  
213,"F03 (Adenosine)"  
214,"F04 (Cytidine)"  
215,"F05 (Cytosine)"  
216,"F06 (Guanine)"  
217,"F07 (Guanosine)"  
218,"F08 (Thymine)"  
219,"F09 (Thymidine)"  
220,"F10 (Uracil)"  
221,"F11 (Uridine)"  
222,"F12 (Inosine).y"  
223,"G01 (Xanthine)"  
224,"G02 (Xanthosine)"  
225,"G05 (Allantoin)"  
226,"G06 (Parabanic Acid)"  
227,"G07 (D,L-a-Amino-Butyric Acid)"  
228,"G08 (g-Amino-n-Butyric Acid)"  
229,"G09 (e-Amino-N-Caproic Acid)"  
230,"G11 (d-Amino-Valeric Acid)"  
231,"G12 (L-Norvaline)"  
232,"H01 (Ala-Asp)"  
233,"H02 (Ala-Gln)"  
234,"H03 (Ala-Glu)"  
235,"H04 (Ala-Gly)"  
236,"H05 (Ala-His)"  
237,"H06 (Ala-Leu)"  
238,"H07 (Ala-Thr)"  
239,"H08 (Gly-Asn)"  
240,"H09 (Gly-Gln)"

241,"H10 (Gly-Glu)"  
242,"H11 (Gly-Met)"  
243,"H12 (Met-Ala)"

#### **PM4**

##### **Phosphorous substrates**

244,"A02 (Sodium Phosphate)"  
245,"A04 (Trimetaphosphate)"  
246,"A05 (Tripolyphosphate)"  
247,"A06 (Triethyl Phosphate)"  
248,"A07 (Hypophosphite)"  
249,"A08 (Adenosine-2'-Monophosphate)"  
250,"A09 (Adenosine-3'-Monophosphate)"  
251,"A10 (Adenosine-5'-Monophosphate)"  
252,"A11 (Adenosine-2',3'-Cyclic Monophosphate)"  
253,"A12 (Adenosine-3',5'-Cyclic Monophosphate)"  
254,"B01 (Thiophosphate #1)"  
255,"B02 (Dithiophosphate #1)"  
256,"B03 (D,L-a-Glycerol-Phosphate)"  
257,"B04 (b-Glycerol Phosphate)"  
258,"B06 (D-2-Phospho-Glyceric Acid)"  
259,"B07 (D-3-Phospho-Glyceric Acid)"  
260,"B08 (Guanosine-2'-Monophosphate)"  
261,"B09 (Guanosine-3'-Monophosphate)"  
262,"B10 (Guanosine-5'-Monophosphate)"  
263,"B11 (Guanosine-2',3'-Cyclic Monophosphate)"  
264,"B12 (Guanosine-3',5'-Cyclic Monophosphate)"  
265,"C01 (Phosphoenol Pyruvate)"  
266,"C02 (Phospho-Glycolic Acid)"  
267,"C03 (a-D-Glucose-1-Phosphate)"  
268,"C04 (D-Glucose-6-Phosphate)"  
269,"C05 (2-Deoxy-D-Glucose-6-Phosphate)"  
270,"C06 (D-Glucosamine-6-Phosphate)"  
271,"C07 (6-Phospho-Gluconic Acid)"  
272,"C08 (Cytidine-2'-Monophosphate)"  
273,"C09 (Cytidine-3'-Monophosphate)"  
274,"C10 (Cytidine-5'-Monophosphate)"  
275,"C11 (Cytidine-2',3'-Cyclic Monophosphate)"  
276,"C12 (Cytidine-3',5'-Cyclic Monophosphate)"  
277,"D01 (D-Mannose-1-Phosphate)"  
278,"D02 (D-Mannose-6-Phosphate)"  
279,"D03 (Cysteamine-S-Phosphate)"  
280,"D04 (Phospho-L-Arginine)"  
281,"D05 (O-Phospho-D-Serine)"  
282,"D06 (O-Phospho-L-Serine)"  
283,"D07 (O-Phospho-L-Threonine)"  
284,"D08 (Uridine-2'-Monophosphate)"  
285,"D09 (Uridine-3'-Monophosphate)"  
286,"D10 (Uridine-5'-Monophosphate)"  
287,"D11 (Uridine-2',3'-Cyclic Monophosphate)"  
288,"D12 (Uridine-3',5'-Cyclic Monophosphate)"

289,"E01 (O-Phospho-D-Tyrosine)"  
290,"E02 (O-Phospho-L-Tyrosine)"  
291,"E03 (Phosphocreatine)"  
292,"E04 (Phosphorylcholine)"  
293,"E05 (O-Phosphoryl-Ethanolamine)"  
294,"E06 (Phosphono Acetic Acid)"  
295,"E07 (2-Aminoethyl Phosphonic Acid)"  
296,"E08 (Methylene Diphosphonic Acid)"  
297,"E09 (Thymidine-3'-Monophosphate)"  
298,"E10 (Thymidine-5'-Monophosphate)"  
299,"E12 (Thymidine 3',5'-Cyclic Monophosphate)"

**Sulfur substrates**

300,"F02 (Sulfate)"  
301,"F03 (Sodium Thiosulfate)"  
302,"F04 (Tetrathionate)"  
303,"F05 (Thiophosphate #2)"  
304,"F06 (Dithiophosphate #2)"  
305,"F07 (L-Cysteine)"  
306,"F08 (D-Cysteine)"  
307,"F09 (Cys-Gly)"  
308,"F10 (L-Cystaic Acid)"  
309,"F11 (Cysteamine)"  
310,"F12 (L-Cysteine Sulfinic Acid)"  
311,"G01 (N-Acetyl-L-Cysteine)"  
312,"G02 (S-Methyl-L-Cysteine)"  
313,"G03 (Cystathionine)"  
314,"G04 (Lanthionine)"  
315,"G05 (Glutathione)"  
316,"G06 (D,L-Ethionine)"  
317,"G07 (L-Methionine)"  
318,"G08 (D-Methionine)"  
319,"G09 (Gly-Met)"  
320,"G10 (N-Acetyl-D,L-Methionine)"  
321,"G11 (L-Methionine Sulfoxide)"  
322,"G12 (L-Methionine Sulfone)"  
323,"H01 (L-Djenkolic Acid)"  
324,"H02 (Thiourea)"  
325,"H03 (1-Thio-b-D-Glucose)"  
326,"H04 (D,L-Lipoamide)"  
327,"H05 (Taurocholic Acid)"  
328,"H06 (Taurine)"  
329,"H07 (Hypotaurine)"  
330,"H08 (p-Amino Benzene Sulfonic Acid)"  
331,"H09 (Butane Sulfonic Acid)"  
332,"H10 (2-Hydroxyethane Sulfonic Acid)"  
333,"H11 (Methane Sulfonic Acid)"  
334,"H12 (Tetramethylene Sulfone)"
