# Supplementary material for: THE ELLIPTIC REPRESENTATION OF THE SIXTH PAINLEV´ E EQUATION
Source: PeerJ journal article supplement (doi:10.7717/peerj.2833), 2004-01-01
Supplement: Lewin_Supplemental_Table_S2.pdf [file Lewin_Supplemental_Table_S2.pdf]

**Table S2.** List of the 23 wells causing abiotic dye reduction. The number and letter of each substrate indicate the exact position in the PM plate.

| <b>Plates</b>     |                            |                                                   |                      |                            |
|-------------------|----------------------------|---------------------------------------------------|----------------------|----------------------------|
| <b>Substrates</b> | <b>PM1</b>                 | <b>PM2</b>                                        | <b>PM3</b>           | <b>PM4</b>                 |
|                   | A-02 L-arabinose           | B-05 D-arabinose                                  | D-10 Ethylenediamine | E-11 Inositol Exaphosphate |
|                   | B-08 D-xylose              | B-09 2 deoxy-D-ribose                             | E-10 D-mannosamine   |                            |
|                   | C-04 D-ribose              | B-12 3-O- $\beta$ -D-galactopyranosyl-D-arabinose | G-03 uric acid       |                            |
|                   | C-06 L-rhamnose            | C-12 palatinose                                   | G-04 Alloxan         |                            |
|                   | E-04 D-fructose-6-phospate | D-04 L-sorbose                                    |                      |                            |
|                   | H-06 L-lyxose              | D-06 D-tagatose                                   |                      |                            |
|                   |                            | E-05 D-glucosamine                                |                      |                            |
|                   |                            | E-12, 5-keto-D-gluconic acid                      |                      |                            |
|                   |                            | F-05 oxalomalic acid                              |                      |                            |
|                   |                            | F-09 sorbic acid,                                 |                      |                            |
|                   |                            | H-09 dihydroxyacetone                             |                      |                            |
|                   |                            | H-11 2,3 butanedione                              |                      |                            |
