# Supplementary material for: Metabolic phenotype of clinical and environmental Mycobacterium avium subsp. hominissuis isolates
Source: PeerJ. 2017 Jan 3;5:e2833. doi: 10.7717/peerj.2833 (PMC5214758; doi:10.7717/peerj.2833)
Supplement: Table S3 — The three pathways where the propionic acid is involved, and the one pathway where the butirric acid is invovled are shown. [file peerj-05-2833-s005.xlsx]

## Sheet: Tables
Distribution of the genes associated with the propionic acid and the butyric acid pathways among the ten MAH isolates
The three pathways where the propionic acid is involved, and the one pathway where the butirric acid is invovled are shown.
Substrate: Propionic acid
Pathway 1: Propanoate metabolism
KEGG pathway reference number: 00640
		Presence of the relative gene involved in the pathway
MAH Strains	Strain source	accA1	accA2	accA3	accD3	accD5	accD6	acetat*	ackA	acs	acsA	acetyl-CoA*	echA1	echA2	echA3	echA4	echA5	echA6	echA7	echA8	echA9	echA11	echA12	echA13	echA14	echA15	echA16	echA17	echA19	echA20	echA21	fadA	fadA2	fadA3	fadA4	fadA5	fadA6	fadB	fadE1	fadE2	fadE4	fadE12	fadE13	fadE20	fadE23	fatt*	gabT	lpdA	ltp3
104	Clinical	Yes	Yes	Yes	Yes	Yes	Yes	Yes	Yes	Yes	Yes	Yes	Yes	Yes	Yes	Yes	Yes	Yes	Yes	Yes	Yes	Yes	Yes	Yes	Yes	Yes	Yes	Yes	Yes	Yes	Yes	Yes	Yes	Yes	Yes	Yes	Yes	Yes	Yes	Yes	Yes	Yes	Yes	Yes	Yes	Yes	Yes	Yes	Yes
P-10091-06	Clinical	Yes	Yes	Yes	Yes	Yes	Yes	Yes	Yes	Yes	Yes	Yes	Yes	Yes	Yes	Yes	Yes	Yes	Yes	Yes	Yes	Yes	Yes	Yes	Yes	Yes	Yes	Yes	Yes	Yes	Yes	Yes	Yes	Yes	Yes	Yes	Yes	Yes	Yes	Yes	Yes	Yes	Yes	Yes	Yes	Yes	Yes	Yes	Yes
2721	Clinical	No	Yes	Yes	Yes	Yes	Yes	Yes	Yes	Yes	Yes	Yes	Yes	Yes	Yes	Yes	Yes	Yes	Yes	Yes	Yes	Yes	Yes	Yes	Yes	Yes	Yes	Yes	Yes	Yes	Yes	Yes	Yes	Yes	Yes	Yes	Yes	Yes	Yes	Yes	Yes	Yes	Yes	Yes	Yes	Yes	Yes	Yes	Yes
P-9-13	Clinical	Yes	Yes	Yes	Yes	Yes	Yes	Yes	Yes	Yes	Yes	Yes	Yes	Yes	Yes	Yes	Yes	Yes	Yes	Yes	Yes	Yes	Yes	Yes	Yes	Yes	No	Yes	Yes	Yes	Yes	Yes	Yes	Yes	Yes	Yes	Yes	Yes	Yes	Yes	Yes	Yes	Yes	Yes	Yes	Yes	Yes	Yes	Yes
TH135	Clinical	Yes	Yes	Yes	Yes	Yes	Yes	Yes	Yes	Yes	Yes	Yes	Yes	Yes	Yes	Yes	Yes	Yes	Yes	Yes	Yes	No	Yes	Yes	Yes	Yes	Yes	Yes	Yes	Yes	Yes	Yes	Yes	Yes	Yes	Yes	Yes	Yes	Yes	Yes	Yes	Yes	Yes	Yes	Yes	Yes	Yes	Yes	Yes
E-128	Environmental	Yes	Yes	Yes	Yes	Yes	Yes	Yes	Yes	Yes	Yes	Yes	Yes	Yes	Yes	Yes	Yes	Yes	Yes	Yes	Yes	Yes	Yes	Yes	Yes	Yes	Yes	Yes	Yes	Yes	Yes	Yes	Yes	Yes	Yes	Yes	Yes	Yes	Yes	Yes	Yes	Yes	Yes	Yes	Yes	Yes	Yes	Yes	Yes
27-1	Environmental	Yes	Yes	Yes	Yes	Yes	Yes	Yes	Yes	Yes	Yes	Yes	Yes	Yes	Yes	Yes	Yes	Yes	Yes	Yes	Yes	Yes	Yes	Yes	Yes	Yes	Yes	Yes	Yes	Yes	Yes	Yes	No	Yes	Yes	Yes	Yes	Yes	Yes	Yes	No	Yes	Yes	Yes	Yes	Yes	Yes	Yes	Yes
E-82-7	Environmental	Yes	Yes	Yes	Yes	Yes	Yes	Yes	Yes	Yes	Yes	Yes	Yes	Yes	Yes	Yes	Yes	Yes	Yes	Yes	Yes	Yes	Yes	Yes	Yes	Yes	Yes	Yes	Yes	Yes	Yes	Yes	Yes	Yes	Yes	Yes	Yes	Yes	Yes	Yes	Yes	Yes	Yes	Yes	Yes	Yes	Yes	Yes	Yes
E-2514	Environmental	Yes	Yes	Yes	Yes	Yes	Yes	Yes	Yes	Yes	Yes	Yes	Yes	Yes	Yes	Yes	Yes	Yes	Yes	Yes	Yes	Yes	Yes	Yes	Yes	Yes	Yes	Yes	Yes	Yes	Yes	Yes	Yes	Yes	Yes	Yes	Yes	Yes	Yes	Yes	Yes	Yes	Yes	Yes	Yes	Yes	Yes	Yes	Yes
E-96-2	Environmental	Yes	Yes	Yes	Yes	Yes	Yes	Yes	Yes	Yes	Yes	Yes	Yes	Yes	Yes	Yes	Yes	Yes	Yes	Yes	Yes	No	Yes	Yes	Yes	Yes	Yes	Yes	Yes	Yes	Yes	Yes	Yes	Yes	Yes	Yes	Yes	Yes	Yes	Yes	Yes	Yes	Yes	Yes	Yes	Yes	Yes	Yes	Yes
	Gene characteristics
	Number of all SNPs	37	36	6	16	9	18	23	23	31	27	119	14	7	23	19	15	8	15	23	10	12	12	8	7	12	12	10	10	11	19	15	23	17	10	12	11	31	147	119	39	15	25	17	18	127	32	25	18
	Number of non-synonymous SNPs	13	6	0	1	0	1	2	2	6	7	37	1	2	2	1	2	0	3	3	3	0	4	0	1	3	3	1	1	0	2	1	3	2	0	0	0	11	19	17	4	1	2	0	1	33	1	4	0
	Gene Length (bp)s	2016	1992	1824	1473	1641	1422	1164	1164	1953	1953	1233	795	912	1293	939	768	732	792	792	1053	814	810	945	771	822	750	774	813	756	825	1212	1347	1221	1170	1161	1161	2148	1351	1233	1710	1167	1149	1164	1206	2133	1350	1479	1194
		MAH: Mycobacterium avium subsp. hominisusis
		* = gene of unknown function
		SNP: Single nucleotide polymorphisms
		bp: base pair
Pathway 2: Nicotinate and nicotinamide metabolism
KEGG pathway reference number: 00760
		Presence of the relative gene involved in the pathway
MAH Strains	Strain source	[NADP+*	alanin*	amidase*	cinA	deoD	gabD2	iunH	NAD*	NAD(P*	nadA	nadB	nadC	nadD	nadE	pncA	pncB	pntA	pntAA	pntAB	pntB	ppnK	purin*	pyridin*	solubl*
104	Clinical	Yes	Yes	Yes	Yes	Yes	Yes	Yes	Yes	Yes	Yes	Yes	Yes	Yes	Yes	Yes	Yes	Yes	Yes	Yes	Yes	Yes	Yes	Yes	Yes
P-10091-06	Clinical	Yes	Yes	Yes	Yes	Yes	Yes	Yes	Yes	Yes	Yes	Yes	Yes	Yes	Yes	Yes	Yes	Yes	Yes	Yes	Yes	Yes	Yes	Yes	Yes
2721	Clinical	Yes	Yes	Yes	Yes	Yes	Yes	Yes	Yes	Yes	Yes	Yes	Yes	Yes	Yes	Yes	Yes	Yes	Yes	Yes	Yes	Yes	Yes	Yes	Yes
P-9-13	Clinical	Yes	Yes	Yes	Yes	Yes	Yes	Yes	Yes	Yes	Yes	Yes	Yes	Yes	Yes	Yes	Yes	Yes	Yes	Yes	Yes	Yes	Yes	Yes	Yes
TH135	Clinical	Yes	Yes	Yes	Yes	Yes	Yes	Yes	Yes	Yes	Yes	Yes	Yes	Yes	Yes	Yes	Yes	Yes	Yes	Yes	Yes	Yes	Yes	Yes	Yes
E-128	Environmental	Yes	Yes	Yes	Yes	Yes	Yes	Yes	Yes	Yes	Yes	Yes	Yes	Yes	Yes	Yes	Yes	Yes	Yes	Yes	Yes	Yes	Yes	Yes	Yes
27-1	Environmental	Yes	Yes	Yes	Yes	Yes	Yes	Yes	Yes	Yes	Yes	Yes	Yes	Yes	Yes	Yes	Yes	Yes	Yes	Yes	Yes	Yes	Yes	Yes	Yes
E-82-7	Environmental	Yes	Yes	Yes	Yes	Yes	Yes	Yes	Yes	Yes	Yes	Yes	Yes	Yes	Yes	Yes	Yes	Yes	Yes	Yes	Yes	Yes	Yes	Yes	Yes
E-2514	Environmental	Yes	Yes	Yes	Yes	Yes	Yes	Yes	Yes	Yes	Yes	Yes	Yes	Yes	Yes	Yes	Yes	Yes	Yes	Yes	Yes	Yes	Yes	Yes	Yes
E-96-2	Environmental	Yes	Yes	Yes	Yes	Yes	Yes	Yes	Yes	Yes	Yes	Yes	Yes	Yes	Yes	Yes	Yes	Yes	Yes	Yes	Yes	Yes	Yes	Yes	Yes
	Gene characteristics
	Number of all SNPs	18	103	8	29	13	20	27	25	23	19	29	7	13	34	8	12	9	104	10	23	16	13	21	21
	Number of non-synonymous SNPs	2	15	0	5	1	2	10	4	3	1	7	1	2	8	2	3	1	18	0	3	5	1	3	7
	Gene Length (bp)s	1419	1099	564	1305	816	1419	1032	2005	1425	1050	1593	855	642	2043	564	1335	318	1099	318	1425	900	816	1416	1416
		MAH: Mycobacterium avium subsp. hominisusis
		* = gene of unknown function
		SNP: Single nucleotide polymorphisms
		bp: base pair
Pathway 3: Degradation of aromatic compounds
KEGG pathway reference number: 01220
		Presence of the relative gene involved in the pathway
MAH Strains	Strain source	adhA	adhB	adhE	alcoho*	Alcoho*	aldehyd*	aromati*	fabG5	malonat*	mhpB	pcaB	pcaC	pcaG	pcaH	putativ*	pyridin*	steroi*	taurin*
104	Clinical	Yes	Yes	Yes	Yes	Yes	Yes	Yes	Yes	Yes	Yes	Yes	Yes	Yes	Yes	Yes	Yes	Yes	Yes
P-10091-06	Clinical	Yes	Yes	Yes	Yes	Yes	Yes	No	Yes	Yes	No	Yes	Yes	Yes	Yes	Yes	Yes	Yes	Yes
2721	Clinical	Yes	Yes	Yes	Yes	Yes	Yes	No	Yes	Yes	Yes	Yes	Yes	Yes	Yes	Yes	Yes	Yes	Yes
P-9-13	Clinical	Yes	Yes	Yes	Yes	Yes	Yes	No	Yes	No	Yes	Yes	Yes	Yes	Yes	Yes	Yes	Yes	Yes
TH135	Clinical	Yes	Yes	Yes	Yes	Yes	Yes	No	Yes	Yes	Yes	Yes	Yes	Yes	Yes	Yes	Yes	Yes	No
E-128	Environmental	Yes	Yes	Yes	Yes	Yes	Yes	No	Yes	No	Yes	No	Yes	Yes	Yes	Yes	Yes	Yes	Yes
27-1	Environmental	Yes	Yes	Yes	Yes	Yes	Yes	Yes	Yes	Yes	Yes	Yes	Yes	Yes	Yes	Yes	Yes	Yes	Yes
E-82-7	Environmental	Yes	Yes	Yes	Yes	Yes	Yes	No	Yes	Yes	Yes	Yes	Yes	Yes	Yes	Yes	Yes	Yes	Yes
E-2514	Environmental	Yes	Yes	Yes	Yes	Yes	Yes	Yes	Yes	No	Yes	Yes	Yes	Yes	Yes	Yes	Yes	Yes	Yes
E-96-2	Environmental	Yes	Yes	Yes	Yes	Yes	Yes	No	Yes	Yes	Yes	Yes	Yes	Yes	Yes	Yes	Yes	Yes	Yes
	Gene characteristics
	Number of all SNPs	20	10	25	22	30	16	15	16	1	13	24	3	12	13	36	25	15	15
	Number of non-synonymous SNPs	3	1	4	4	6	2	5	2	0	0	19	0	6	5	9	8	3	6
	Gene Length (bp)s	1032	1130	1093	1143	1032	969	723	795	393	951	1227	441	564	765	1500	1233	1623	888
		MAH: Mycobacterium avium subsp. hominisusis
		* = gene of unknown function
		SNP: Single nucleotide polymorphisms
		bp: base pair
Substrate: Butyric acid
Pathway 1: Butanoate metabolism
KEGG pathway reference number: 00650
		Presence of the relative gene involved in the pathway
MAH Strains	Strain source	[NADP+*	acetyl-CoA*	echA1	echA2	echA3	echA4	echA5	echA6	echA7	echA8	echA9	echA11	echA12	echA13	echA14	echA15	echA16	echA17	echA19	echA20	echA21	fadA	fadA2	fadA3	fadA4	fadA5	fadA6	fadB	fadB2	fatt*	fumarat*	gabD2	gabT	gadB	ilvB	ilvN	ilvX	ltp3	orB	probabl*	putativ*	pyruvat*	scoB	sdhA	sdhB	sdhC	sdhD	thiamin*
104	Clinical	Yes	Yes	Yes	Yes	Yes	Yes	Yes	Yes	Yes	Yes	Yes	Yes	Yes	Yes	Yes	Yes	Yes	Yes	Yes	Yes	Yes	Yes	Yes	Yes	Yes	Yes	Yes	Yes	Yes	Yes	Yes	Yes	Yes	Yes	Yes	Yes	Yes	Yes	Yes	Yes	Yes	Yes	Yes	Yes	Yes	Yes	Yes	Yes
P-10091-06	Clinical	Yes	Yes	Yes	Yes	Yes	Yes	Yes	Yes	Yes	Yes	Yes	Yes	Yes	Yes	Yes	Yes	Yes	Yes	Yes	Yes	Yes	Yes	Yes	Yes	Yes	Yes	Yes	Yes	Yes	Yes	Yes	Yes	Yes	Yes	Yes	Yes	No	Yes	Yes	Yes	Yes	Yes	Yes	Yes	Yes	Yes	Yes	Yes
2721	Clinical	Yes	Yes	Yes	Yes	Yes	Yes	Yes	Yes	Yes	Yes	Yes	Yes	Yes	Yes	Yes	Yes	Yes	Yes	Yes	Yes	Yes	Yes	Yes	Yes	Yes	Yes	Yes	Yes	Yes	Yes	Yes	Yes	Yes	Yes	Yes	Yes	Yes	Yes	Yes	Yes	Yes	Yes	Yes	Yes	Yes	Yes	Yes	Yes
P-9-13	Clinical	Yes	Yes	Yes	Yes	Yes	Yes	Yes	Yes	Yes	Yes	Yes	Yes	Yes	Yes	Yes	Yes	No	Yes	Yes	Yes	Yes	Yes	Yes	Yes	Yes	Yes	Yes	Yes	Yes	Yes	Yes	Yes	Yes	Yes	Yes	Yes	Yes	Yes	Yes	Yes	Yes	Yes	Yes	Yes	Yes	Yes	Yes	Yes
TH135	Clinical	Yes	Yes	Yes	Yes	Yes	Yes	Yes	Yes	Yes	Yes	Yes	No	Yes	Yes	Yes	Yes	Yes	Yes	Yes	Yes	Yes	Yes	Yes	Yes	Yes	Yes	Yes	Yes	Yes	Yes	Yes	Yes	Yes	Yes	Yes	Yes	Yes	Yes	Yes	Yes	Yes	Yes	Yes	Yes	Yes	Yes	Yes	Yes
E-128	Environmental	Yes	Yes	Yes	Yes	Yes	Yes	Yes	Yes	Yes	Yes	Yes	Yes	Yes	Yes	Yes	Yes	Yes	Yes	Yes	Yes	Yes	Yes	Yes	Yes	Yes	Yes	Yes	Yes	Yes	Yes	Yes	Yes	Yes	Yes	Yes	Yes	Yes	Yes	Yes	Yes	Yes	Yes	Yes	Yes	Yes	Yes	Yes	Yes
27-1	Environmental	Yes	Yes	Yes	Yes	Yes	Yes	Yes	Yes	Yes	Yes	Yes	Yes	Yes	Yes	Yes	Yes	Yes	Yes	Yes	Yes	Yes	Yes	No	Yes	Yes	Yes	Yes	Yes	Yes	Yes	Yes	Yes	Yes	Yes	Yes	Yes	Yes	Yes	Yes	Yes	Yes	Yes	Yes	Yes	Yes	Yes	Yes	Yes
E-82-7	Environmental	Yes	Yes	Yes	Yes	Yes	Yes	Yes	Yes	Yes	Yes	Yes	Yes	Yes	Yes	Yes	Yes	Yes	Yes	Yes	Yes	Yes	Yes	Yes	Yes	Yes	Yes	Yes	Yes	Yes	Yes	Yes	Yes	Yes	Yes	Yes	Yes	Yes	Yes	Yes	Yes	Yes	Yes	Yes	Yes	Yes	Yes	Yes	Yes
E-2514	Environmental	Yes	Yes	Yes	Yes	Yes	Yes	Yes	Yes	Yes	Yes	Yes	Yes	Yes	Yes	Yes	Yes	Yes	Yes	Yes	Yes	Yes	Yes	Yes	Yes	Yes	Yes	Yes	Yes	Yes	Yes	Yes	Yes	Yes	Yes	Yes	Yes	Yes	Yes	Yes	Yes	Yes	Yes	Yes	Yes	Yes	Yes	Yes	Yes
E-96-2	Environmental	Yes	Yes	Yes	Yes	Yes	Yes	Yes	Yes	Yes	Yes	Yes	No	Yes	Yes	Yes	Yes	Yes	Yes	Yes	Yes	Yes	Yes	Yes	Yes	Yes	Yes	Yes	Yes	Yes	Yes	Yes	Yes	Yes	Yes	Yes	Yes	Yes	Yes	Yes	Yes	Yes	Yes	Yes	Yes	Yes	Yes	Yes	Yes
	Gene characteristics
	Number of all SNPs	18	119	14	7	23	19	15	8	15	23	10	12	12	8	7	12	12	10	10	11	19	15	23	17	10	12	11	31	9	127	47	20	32	18	48	6	15	18	16	18	29	26	24	16	10	5	3	18
	Number of non-synonymous SNPs	2	37	1	2	2	1	2	0	3	3	3	0	4	0	1	3	3	1	1	0	2	1	3	2	0	0	0	11	1	33	12	2	1	2	18	0	2	0	2	3	5	4	4	2	1	1	0	2
	Gene Length (bp)s	1419	1233	795	912	1293	939	768	732	792	792	1053	814	810	945	771	822	750	774	813	756	825	1212	1347	1221	1170	1161	1161	2148	864	2133	747	1419	1350	1392	1869	507	1254	1194	1092	792	906	1971	1350	1755	804	456	471	1647
		MAH: Mycobacterium avium subsp. hominisusis
		* = gene of unknown function
		SNP: Single nucleotide polymorphisms
		bp: base pair
[truncated: 12 more columns]
