# Supplementary material for: Metabolic phenotype of clinical and environmental Mycobacterium avium subsp. hominissuis isolates
Source: PeerJ. 2017 Jan 3;5:e2833. doi: 10.7717/peerj.2833 (PMC5214758; doi:10.7717/peerj.2833)
Supplement: Table S5 — The presence or abscence of the 1,688 genes in the five clinical MAH isolates is shown. The genes are ordered by frequency. The number of genes specific and unique for each clinical isolate is provided. [file peerj-05-2833-s007.xlsx]

## Sheet: Sheet1
Distribution of the 1688 genes specific for the clinical isolates of Mycobacterium avium subsp. hominissuis(MAH)
The presence or abscence of the 1688 genes in the five clinical MAH isolates is shown. The genes are ordered by frequency.
The number of genes specific and unique for each clinical isolate is provided.
Gene name if known	Annotation	No. Isolates	Presence in the respective clinical isolate						No. Genes specific for the isolate P-10091-06	0
			P-10091-06	2721	104	P-9-13	TH135		No. Genes specific for the isolate 2721	2
group_2398	hypothetical protein	4	Yes	Yes	Yes	Yes	No		No. Genes specific for the isolate 104	181
group_3345	hypothetical protein	3	Yes	Yes	No	Yes	No		No. Genes specific for the isolate P-9-13	1063
group_380	hypothetical protein	3	Yes	No	No	Yes	Yes		No. Genes specific for the isolate TH135	381
dlaT_2	Dihydrolipoyllysine-residue acetyltransferase component of pyruvate dehydrogenase complex	2	No	No	No	Yes	Yes
fbpC_1	Diacylglycerol acyltransferase/mycolyltransferase Ag85C	2	No	No	No	Yes	Yes
fitB_1	Toxin FitB	2	No	No	No	Yes	Yes
ftsK_3	DNA translocase FtsK	2	Yes	No	No	Yes	No
dhbF_1	Dimodular nonribosomal peptide synthase	2	Yes	No	No	Yes	No
group_1144	hypothetical protein	2	No	No	No	Yes	Yes
pknH_4	Serine/threonine-protein kinase PknH	2	No	No	Yes	No	Yes
group_1677	hypothetical protein	2	Yes	No	No	Yes	No
group_1678	hypothetical protein	2	Yes	No	No	Yes	No
group_1679	hypothetical protein	2	Yes	No	No	Yes	No
group_2407	hypothetical protein	2	Yes	No	No	Yes	No
group_2583	hypothetical protein	2	Yes	No	No	Yes	No
nicB	6-hydroxy-3-succinoylpyridine 3-monooxygenase HspA	2	Yes	No	No	Yes	No
group_2739	hypothetical protein	2	No	No	Yes	Yes	No
group_2744	hypothetical protein	2	No	No	Yes	Yes	No
group_2845	hypothetical protein	2	No	No	No	Yes	Yes
group_2847	hypothetical protein	2	No	No	No	Yes	Yes
group_2848	hypothetical protein	2	No	No	No	Yes	Yes
group_2849	hypothetical protein	2	No	No	No	Yes	Yes
group_2864	hypothetical protein	2	No	No	No	Yes	Yes
group_3180	hypothetical protein	2	Yes	No	No	Yes	No
group_3181	hypothetical protein	2	Yes	No	No	Yes	No
group_3183	hypothetical protein	2	Yes	No	No	Yes	No
group_3184	hypothetical protein	2	Yes	No	No	Yes	No
group_3186	hypothetical protein	2	Yes	No	No	Yes	No
group_3187	hypothetical protein	2	Yes	No	No	Yes	No
group_3188	hypothetical protein	2	Yes	No	No	Yes	No
group_3189	hypothetical protein	2	Yes	No	No	Yes	No
group_3190	hypothetical protein	2	Yes	No	No	Yes	No
group_3191	hypothetical protein	2	Yes	No	No	Yes	No
group_3366	hypothetical protein	2	Yes	No	No	Yes	No
group_3367	hypothetical protein	2	Yes	No	No	Yes	No
group_3408	hypothetical protein	2	Yes	No	No	Yes	No
group_3409	hypothetical protein	2	Yes	No	No	Yes	No
hsaA_4	Flavin-dependent monooxygenase; oxygenase subunit HsaA	2	No	No	No	Yes	Yes
group_3413	hypothetical protein	2	Yes	No	No	Yes	No
group_3414	hypothetical protein	2	Yes	No	No	Yes	No
group_3415	hypothetical protein	2	Yes	No	No	Yes	No
group_3416	hypothetical protein	2	Yes	No	No	Yes	No
group_3470	hypothetical protein	2	Yes	No	No	Yes	No
amt_2	Ammonium transporter NrgA	2	No	No	Yes	Yes	No
group_3781	hypothetical protein	2	No	Yes	No	Yes	No
group_3892	hypothetical protein	2	No	No	Yes	Yes	No
group_43	hypothetical protein	2	No	No	No	Yes	Yes
group_4762	hypothetical protein	2	No	No	No	Yes	Yes
group_5162	hypothetical protein	2	No	No	No	Yes	Yes
group_5407	hypothetical protein	2	Yes	No	No	Yes	No
group_5519	hypothetical protein	2	No	No	No	Yes	Yes
group_5647	hypothetical protein	2	No	No	No	Yes	Yes
group_5721	hypothetical protein	2	No	No	No	Yes	Yes
group_5764	hypothetical protein	2	No	No	No	Yes	Yes
group_577	hypothetical protein	2	No	No	No	Yes	Yes
ppe2_2	putative PPE family protein PPE2	2	No	Yes	No	Yes	No
hin_4	DNA-invertase hin	2	Yes	No	No	Yes	No
hindIIIM	Modification methylase DpnIIB	2	No	No	Yes	Yes	No
mutT4_2	Putative mutator protein MutT4	2	Yes	No	No	Yes	No
recF_2	DNA replication and repair protein RecF	2	No	No	Yes	Yes	No
yidD	Putative membrane protein insertion efficiency factor	2	No	No	Yes	Yes	No
accD3_2	Putative acetyl-coenzyme A carboxylase carboxyl transferase subunit beta	1	No	No	No	Yes	No
aceE_1	Pyruvate dehydrogenase E1 component	1	No	No	No	No	Yes
acuR	Transcriptional regulator AcuR	1	No	No	No	No	Yes
acuR_1	Transcriptional regulator AcuR	1	No	No	No	Yes	No
adh	Alcohol dehydrogenase	1	No	No	No	No	Yes
aldA_2	Putative aldehyde dehydrogenase AldA	1	No	No	No	Yes	No
amnD_2	2-aminomuconate deaminase	1	No	No	No	Yes	No
arsC2	Arsenate-mycothiol transferase ArsC2	1	No	No	No	No	Yes
aruH_1	Arginine--pyruvate transaminase AruH	1	No	No	No	No	Yes
aruH_2	Arginine--pyruvate transaminase AruH	1	No	No	No	No	Yes
baeS_1	Signal transduction histidine-protein kinase BaeS	1	No	No	No	Yes	No
banIM	Modification methylase BanI	1	No	No	Yes	No	No
bchI_1	Magnesium-chelatase 38 kDa subunit	1	No	No	No	No	Yes
bcp_2	Putative peroxiredoxin	1	No	No	No	Yes	No
bdbD	Disulfide bond formation protein D	1	No	No	No	Yes	No
betI_9	HTH-type transcriptional regulator BetI	1	No	No	No	Yes	No
bigR	Biofilm growth-associated repressor	1	No	No	No	No	Yes
bphC2	Biphenyl-2;3-diol 1;2-dioxygenase 2	1	No	No	No	No	Yes
btrR	L-glutamine:2-deoxy-scyllo-inosose aminotransferase	1	No	No	No	Yes	No
clcA_2	H( )/Cl(-) exchange transporter ClcA	1	No	No	No	No	Yes
clsA	Cardiolipin synthase A	1	No	No	Yes	No	No
cmtR_1	HTH-type transcriptional regulator CmtR	1	No	No	No	Yes	No
cmtR_3	HTH-type transcriptional regulator CmtR	1	No	No	No	Yes	No
cobL_2	Precorrin-6Y C(5;15)-methyltransferase [decarboxylating]	1	No	No	No	Yes	No
cobM_2	Precorrin-4 C(11)-methyltransferase	1	No	No	No	Yes	No
copZ	Copper chaperone CopZ	1	No	No	No	No	Yes
crt_3	Short-chain-enoyl-CoA hydratase	1	No	No	No	Yes	No
csoR	Copper-sensing transcriptional repressor CsoR	1	No	No	No	No	Yes
ctpA_2	Cation-transporting P-type ATPase A	1	No	No	No	No	Yes
ctpC_3	putative manganese/zinc-exporting P-type ATPase	1	No	No	No	Yes	No
ctpG_3	putative cation-transporting ATPase G	1	No	No	No	Yes	No
ctpV_5	putative copper-exporting P-type ATPase V	1	No	No	No	Yes	No
ctpV_6	putative copper-exporting P-type ATPase V	1	No	No	No	Yes	No
cyaA	Adenylate cyclase 1	1	No	No	No	Yes	No
cyaB_4	Adenylate cyclase 2	1	No	No	No	Yes	No
czcD_3	Cadmium; cobalt and zinc/H( )-K( ) antiporter	1	No	No	No	Yes	No
dauE_2	Aklaviketone reductase DauE	1	No	No	No	Yes	No
dhmA1_1	Haloalkane dehalogenase 1	1	No	No	No	Yes	No
dhmA_3	Haloalkane dehalogenase	1	No	No	No	No	Yes
dinF	DNA-damage-inducible protein F	1	No	No	No	Yes	No
dmdB_3	3-methylmercaptopropionyl-CoA ligase	1	No	No	No	Yes	No
dnaB_1	Replicative DNA helicase	1	No	No	No	Yes	No
doc_2	Toxin Doc	1	No	No	No	Yes	No
dpnA	Modification methylase DpnIIB	1	No	No	Yes	No	No
dtd3	D-aminoacyl-tRNA deacylase	1	No	No	No	Yes	No
eccA3_2	ESX-3 secretion system protein EccA3	1	No	No	No	Yes	No
eccB5_3	ESX-5 secretion system protein EccB5	1	No	No	No	No	Yes
eccC3_3	ESX-3 secretion system protein EccC3	1	No	No	No	Yes	No
eccC3_4	ESX-3 secretion system protein EccC3	1	No	No	No	Yes	No
eccC5_3	ESX-5 secretion system protein EccC5	1	No	No	No	No	Yes
eccE2_1	ESX-2 secretion system protein EccE2	1	No	No	Yes	No	No
ecdB	putative UbiX-like flavin prenyltransferase	1	No	No	No	Yes	No
edcC	Phenolic acid decarboxylase subunit C	1	No	No	No	Yes	No
egtA_1	Glutamate--cysteine ligase EgtA	1	No	No	No	No	Yes
egtD_1	Histidine N-alpha-methyltransferase	1	No	No	No	No	Yes
elmMIII_4	8-demethyl-8-(2;3-dimethoxy-alpha-L-rhamnosyl)-tetracenomycin-C 4'-O-methyltransferase	1	No	No	No	Yes	No
elmMIII_5	8-demethyl-8-(2;3-dimethoxy-alpha-L-rhamnosyl)-tetracenomycin-C 4'-O-methyltransferase	1	No	No	No	Yes	No
elmMIII_6	8-demethyl-8-(2;3-dimethoxy-alpha-L-rhamnosyl)-tetracenomycin-C 4'-O-methyltransferase	1	No	No	No	Yes	No
embA_2	putative arabinosyltransferase A	1	No	No	No	Yes	No
ephD_6	putative oxidoreductase EphD	1	No	No	No	Yes	No
ephD_8	putative oxidoreductase EphD	1	No	No	Yes	No	No
fac-dex	Fluoroacetate dehalogenase	1	No	No	No	No	Yes
fcl_1	GDP-L-fucose synthase	1	No	No	No	No	Yes
fitB_2	Toxin FitB	1	No	No	No	Yes	No
fmt_2	Methionyl-tRNA formyltransferase	1	No	No	No	No	Yes
folD_2	Bifunctional protein FolD protein	1	No	No	No	Yes	No
ftsK_1	DNA translocase FtsK	1	No	No	No	Yes	No
gatC_2	Glutamyl-tRNA(Gln) amidotransferase subunit C	1	No	No	No	Yes	No
gltC_1	HTH-type transcriptional regulator GltC	1	No	No	No	Yes	No
gmd_2	GDP-mannose 4;6-dehydratase	1	No	No	No	No	Yes
groL2_1	60 kDa chaperonin 2	1	No	No	No	Yes	No
group_1001	hypothetical protein	1	No	No	No	Yes	No
group_1002	hypothetical protein	1	No	No	No	Yes	No
lgrD_2	Linear gramicidin synthase subunit D	1	No	No	No	Yes	No
group_1070	hypothetical protein	1	No	No	No	No	Yes
xfp	Xylulose-5-phosphate/fructose-6-phosphate phosphoketolase	1	No	No	No	Yes	No
group_1106	Putative cytochrome P450 140	1	No	No	No	Yes	No
araQ_2	L-arabinose transport system permease protein AraQ	1	No	No	No	Yes	No
group_1147	hypothetical protein	1	No	No	No	Yes	No
pyrE_1	Orotate phosphoribosyltransferase	1	No	No	No	Yes	No
pyrE_2	Orotate phosphoribosyltransferase	1	No	No	No	Yes	No
group_1196	hypothetical protein	1	No	No	No	Yes	No
ppe2_4	putative PPE family protein PPE2	1	No	No	No	Yes	No
atsA_1	Arylsulfatase	1	No	No	No	Yes	No
atsA_2	Arylsulfatase	1	No	No	No	Yes	No
group_1269	Long-chain-fatty-acid--CoA ligase FadD17	1	No	No	No	Yes	No
group_1304	hypothetical protein	1	No	No	No	Yes	No
group_1325	hypothetical protein	1	No	No	No	Yes	No
group_1327	hypothetical protein	1	No	No	No	Yes	No
group_1329	hypothetical protein	1	No	No	No	Yes	No
viuB_2	Vibriobactin utilization protein ViuB	1	No	No	No	Yes	No
parB_2	putative chromosome-partitioning protein ParB	1	No	No	No	Yes	No
group_1472	hypothetical protein	1	No	No	No	Yes	No
group_150	putative PPE family protein PPE51	1	No	No	No	Yes	No
fgd2_5	F420-dependent hydroxymycolic acid dehydrogenase	1	No	No	No	Yes	No
mshA_2	D-inositol 3-phosphate glycosyltransferase	1	No	No	No	Yes	No
mshA_3	D-inositol 3-phosphate glycosyltransferase	1	No	No	No	Yes	No
fabH_2	3-oxoacyl-[acyl-carrier-protein] synthase 3	1	No	No	No	Yes	No
group_1687	hypothetical protein	1	No	No	No	Yes	No
yhdG_2	putative amino acid permease YhdG	1	No	No	No	Yes	No
sigX_2	ECF RNA polymerase sigma factor SigX	1	No	No	No	Yes	No
baiE_2	Bile acid 7-alpha dehydratase	1	No	No	No	Yes	No
group_1796	hypothetical protein	1	No	No	No	Yes	No
fabG1_3	3-oxoacyl-[acyl-carrier-protein] reductase FabG1	1	No	No	No	Yes	No
group_1821	hypothetical protein	1	No	No	No	Yes	No
group_1823	putative glycosyltransferase	1	No	No	No	Yes	No
group_183	hypothetical protein	1	No	No	No	Yes	No
group_2039	hypothetical protein	1	No	No	No	Yes	No
yxeP_2	putative hydrolase YxeP	1	No	No	No	Yes	No
group_2161	Cytochrome P450 107B1	1	No	No	No	Yes	No
acrC_8	Acryloyl-CoA reductase (NADH)	1	No	No	No	Yes	No
sir_2	Sulfite reductase [ferredoxin]	1	No	No	No	Yes	No
group_2268	hypothetical protein	1	No	No	No	Yes	No
group_228	hypothetical protein	1	No	No	No	Yes	No
todD	Cis-toluene dihydrodiol dehydrogenase	1	No	No	No	Yes	No
pgsA1_1	CDP-diacylglycerol--inositol 3-phosphatidyltransferase	1	No	No	No	Yes	No
pgsA1_2	CDP-diacylglycerol--inositol 3-phosphatidyltransferase	1	No	No	No	Yes	No
group_236	hypothetical protein	1	No	No	No	No	Yes
group_240	hypothetical protein	1	No	No	No	Yes	No
group_2408	hypothetical protein	1	No	No	No	Yes	No
group_241	hypothetical protein	1	No	No	No	No	Yes
group_242	hypothetical protein	1	No	No	No	No	Yes
group_2449	hypothetical protein	1	No	No	No	Yes	No
gcvT_2	Aminomethyltransferase	1	No	No	No	Yes	No
group_2473	hypothetical protein	1	No	No	No	Yes	No
group_2501	hypothetical protein	1	No	No	No	Yes	No
group_26	hypothetical protein	1	No	No	No	Yes	No
group_260	hypothetical protein	1	No	No	No	Yes	No
acg	Putative NAD(P)H nitroreductase acg	1	No	No	No	Yes	No
group_273	putative glycosyltransferase	1	No	No	No	Yes	No
group_274	putative glycosyltransferase	1	No	No	No	Yes	No
ripA_2	Peptidoglycan endopeptidase RipA	1	No	No	Yes	No	No
group_280	hypothetical protein	1	No	No	No	Yes	No
group_281	hypothetical protein	1	No	No	No	Yes	No
group_2812	hypothetical protein	1	No	No	No	Yes	No
mmgC_12	Acyl-CoA dehydrogenase	1	No	No	No	Yes	No
group_2854	Putative cytochrome P450 136	1	No	No	No	Yes	No
group_2855	Putative cytochrome P450 136	1	No	No	No	Yes	No
group_2856	hypothetical protein	1	No	No	No	Yes	No
group_2857	hypothetical protein	1	No	No	No	Yes	No
group_2858	hypothetical protein	1	No	No	No	Yes	No
group_2860	hypothetical protein	1	No	No	No	Yes	No
group_2861	hypothetical protein	1	No	No	No	Yes	No
group_2862	hypothetical protein	1	No	No	No	Yes	No
group_2866	hypothetical protein	1	No	No	No	Yes	No
group_2868	hypothetical protein	1	No	No	No	Yes	No
group_2877	hypothetical protein	1	No	No	No	Yes	No
group_2879	hypothetical protein	1	No	No	No	Yes	No
group_2885	hypothetical protein	1	No	No	No	Yes	No
group_2905	hypothetical protein	1	No	No	No	Yes	No
group_2911	hypothetical protein	1	No	No	No	Yes	No
kasB_2	3-oxoacyl-[acyl-carrier-protein] synthase 2	1	No	No	No	Yes	No
ldtB_2	L;D-transpeptidase 2	1	No	No	No	Yes	No
group_350	hypothetical protein	1	No	No	No	Yes	No
group_351	hypothetical protein	1	No	No	No	Yes	No
group_352	hypothetical protein	1	No	No	No	Yes	No
group_367	hypothetical protein	1	No	No	No	Yes	No
group_377	hypothetical protein	1	No	No	No	Yes	No
group_3804	hypothetical protein	1	No	Yes	No	No	No
group_3891	hypothetical protein	1	No	No	Yes	No	No
group_3897	hypothetical protein	1	No	No	Yes	No	No
group_3898	hypothetical protein	1	No	No	Yes	No	No
group_3899	hypothetical protein	1	No	No	Yes	No	No
group_3900	hypothetical protein	1	No	No	Yes	No	No
group_3901	hypothetical protein	1	No	No	Yes	No	No
group_3902	hypothetical protein	1	No	No	Yes	No	No
group_3903	hypothetical protein	1	No	No	Yes	No	No
group_3904	hypothetical protein	1	No	No	Yes	No	No
group_3905	hypothetical protein	1	No	No	Yes	No	No
group_3906	hypothetical protein	1	No	No	Yes	No	No
group_3907	hypothetical protein	1	No	No	Yes	No	No
group_3908	putative PPE family protein PPE32	1	No	No	Yes	No	No
group_3909	hypothetical protein	1	No	No	Yes	No	No
group_3910	hypothetical protein	1	No	No	Yes	No	No
group_3911	hypothetical protein	1	No	No	Yes	No	No
group_3912	hypothetical protein	1	No	No	Yes	No	No
group_3913	hypothetical protein	1	No	No	Yes	No	No
group_3914	hypothetical protein	1	No	No	Yes	No	No
group_3915	hypothetical protein	1	No	No	Yes	No	No
group_3916	hypothetical protein	1	No	No	Yes	No	No
group_3917	hypothetical protein	1	No	No	Yes	No	No
group_3918	hypothetical protein	1	No	No	Yes	No	No
group_3919	hypothetical protein	1	No	No	Yes	No	No
group_3920	hypothetical protein	1	No	No	Yes	No	No
group_3921	hypothetical protein	1	No	No	Yes	No	No
group_3922	hypothetical protein	1	No	No	Yes	No	No
group_3923	hypothetical protein	1	No	No	Yes	No	No
group_3924	hypothetical protein	1	No	No	Yes	No	No
group_3925	hypothetical protein	1	No	No	Yes	No	No
group_3926	hypothetical protein	1	No	No	Yes	No	No
group_3927	hypothetical protein	1	No	No	Yes	No	No
group_3928	hypothetical protein	1	No	No	Yes	No	No
group_3929	hypothetical protein	1	No	No	Yes	No	No
group_3930	hypothetical protein	1	No	No	Yes	No	No
group_3931	hypothetical protein	1	No	No	Yes	No	No
group_3932	hypothetical protein	1	No	No	Yes	No	No
group_3933	hypothetical protein	1	No	No	Yes	No	No
group_3934	hypothetical protein	1	No	No	Yes	No	No
group_3935	hypothetical protein	1	No	No	Yes	No	No
group_3936	hypothetical protein	1	No	No	Yes	No	No
group_3937	hypothetical protein	1	No	No	Yes	No	No
group_3938	hypothetical protein	1	No	No	Yes	No	No
group_3939	hypothetical protein	1	No	No	Yes	No	No
group_3940	hypothetical protein	1	No	No	Yes	No	No
group_3942	hypothetical protein	1	No	No	Yes	No	No
group_3943	hypothetical protein	1	No	No	Yes	No	No
group_3944	hypothetical protein	1	No	No	Yes	No	No
group_3945	hypothetical protein	1	No	No	Yes	No	No
group_3946	hypothetical protein	1	No	No	Yes	No	No
group_3947	hypothetical protein	1	No	No	Yes	No	No
group_3948	hypothetical protein	1	No	No	Yes	No	No
group_3949	hypothetical protein	1	No	No	Yes	No	No
group_3950	hypothetical protein	1	No	No	Yes	No	No
group_3951	hypothetical protein	1	No	No	Yes	No	No
group_3952	hypothetical protein	1	No	No	Yes	No	No
group_3953	hypothetical protein	1	No	No	Yes	No	No
group_3954	hypothetical protein	1	No	No	Yes	No	No
group_3955	hypothetical protein	1	No	No	Yes	No	No
group_3956	hypothetical protein	1	No	No	Yes	No	No
group_3957	hypothetical protein	1	No	No	Yes	No	No
eccB5_2	ESX-5 secretion system protein EccB5	1	No	No	Yes	No	No
eccC5_2	ESX-5 secretion system protein EccC5	1	No	No	Yes	No	No
eccC5_3	ESX-5 secretion system protein EccC5	1	No	No	Yes	No	No
group_3961	hypothetical protein	1	No	No	Yes	No	No
ppe2_2	putative PPE family protein PPE2	1	No	No	Yes	No	No
group_3963	hypothetical protein	1	No	No	Yes	No	No
group_3964	hypothetical protein	1	No	No	Yes	No	No
espG5_1	ESX-5 secretion-associated protein EspG5	1	No	No	Yes	No	No
espI_3	ESX-1 secretion-associated protein EspI	1	No	No	Yes	No	No
eccD5_1	ESX-5 secretion system protein EccD5	1	No	No	Yes	No	No
group_3968	Thermophilic serine proteinase	1	No	No	Yes	No	No
eccA5_1	ESX-5 secretion system protein EccA5	1	No	No	Yes	No	No
group_3971	hypothetical protein	1	No	No	Yes	No	No
group_3972	hypothetical protein	1	No	No	Yes	No	No
group_3973	hypothetical protein	1	No	No	Yes	No	No
group_3975	hypothetical protein	1	No	No	Yes	No	No
group_3977	hypothetical protein	1	No	No	Yes	No	No
group_3978	hypothetical protein	1	No	No	Yes	No	No
group_3979	hypothetical protein	1	No	No	Yes	No	No
group_3980	hypothetical protein	1	No	No	Yes	No	No
group_3981	hypothetical protein	1	No	No	Yes	No	No
group_3982	hypothetical protein	1	No	No	Yes	No	No
group_3983	hypothetical protein	1	No	No	Yes	No	No
group_3984	hypothetical protein	1	No	No	Yes	No	No
group_3985	hypothetical protein	1	No	No	Yes	No	No
group_3987	hypothetical protein	1	No	No	Yes	No	No
group_3988	hypothetical protein	1	No	No	Yes	No	No
group_3989	hypothetical protein	1	No	No	Yes	No	No
group_3990	hypothetical protein	1	No	No	Yes	No	No
group_3991	hypothetical protein	1	No	No	Yes	No	No
group_3993	hypothetical protein	1	No	No	Yes	No	No
traI	Multifunctional conjugation protein TraI	1	No	No	Yes	No	No
group_3995	hypothetical protein	1	No	No	Yes	No	No
group_3996	hypothetical protein	1	No	No	Yes	No	No
group_3997	hypothetical protein	1	No	No	Yes	No	No
group_3998	hypothetical protein	1	No	No	Yes	No	No
group_3999	hypothetical protein	1	No	No	Yes	No	No
group_4000	hypothetical protein	1	No	No	Yes	No	No
group_4001	hypothetical protein	1	No	No	Yes	No	No
group_4002	hypothetical protein	1	No	No	Yes	No	No
nrdH_2	Glutaredoxin-like protein NrdH	1	No	No	Yes	No	No
group_4005	hypothetical protein	1	No	No	Yes	No	No
group_4006	hypothetical protein	1	No	No	Yes	No	No
group_4007	hypothetical protein	1	No	No	Yes	No	No
group_4008	hypothetical protein	1	No	No	Yes	No	No
group_4009	hypothetical protein	1	No	No	Yes	No	No
group_4010	hypothetical protein	1	No	No	Yes	No	No
group_4011	hypothetical protein	1	No	No	Yes	No	No
group_4012	hypothetical protein	1	No	No	Yes	No	No
group_4013	hypothetical protein	1	No	No	Yes	No	No
group_4014	hypothetical protein	1	No	No	Yes	No	No
group_4015	hypothetical protein	1	No	No	Yes	No	No
group_4016	hypothetical protein	1	No	No	Yes	No	No
group_4017	hypothetical protein	1	No	No	Yes	No	No
group_4019	hypothetical protein	1	No	No	Yes	No	No
group_4020	hypothetical protein	1	No	No	Yes	No	No
group_4021	hypothetical protein	1	No	No	Yes	No	No
group_4022	hypothetical protein	1	No	No	Yes	No	No
group_4025	hypothetical protein	1	No	No	Yes	No	No
group_4026	hypothetical protein	1	No	No	Yes	No	No
group_4027	hypothetical protein	1	No	No	Yes	No	No
group_4028	hypothetical protein	1	No	No	Yes	No	No
group_4029	hypothetical protein	1	No	No	Yes	No	No
group_4030	hypothetical protein	1	No	No	Yes	No	No
group_4031	hypothetical protein	1	No	No	Yes	No	No
group_4032	hypothetical protein	1	No	No	Yes	No	No
group_4034	hypothetical protein	1	No	No	Yes	No	No
group_4035	Immunogenic protein MPT63	1	No	No	Yes	No	No
group_4036	hypothetical protein	1	No	No	Yes	No	No
group_4037	hypothetical protein	1	No	No	Yes	No	No
soj_4	Chromosome-partitioning ATPase Soj	1	No	No	Yes	No	No
group_4039	hypothetical protein	1	No	No	Yes	No	No
group_4040	hypothetical protein	1	No	No	Yes	No	No
group_4041	hypothetical protein	1	No	No	Yes	No	No
group_4042	hypothetical protein	1	No	No	Yes	No	No
group_4043	hypothetical protein	1	No	No	Yes	No	No
group_4044	hypothetical protein	1	No	No	Yes	No	No
group_4045	hypothetical protein	1	No	No	Yes	No	No
group_4046	hypothetical protein	1	No	No	Yes	No	No
group_4047	hypothetical protein	1	No	No	Yes	No	No
group_4048	hypothetical protein	1	No	No	Yes	No	No
group_4049	hypothetical protein	1	No	No	Yes	No	No
group_4050	hypothetical protein	1	No	No	Yes	No	No
group_4051	hypothetical protein	1	No	No	Yes	No	No
group_4052	hypothetical protein	1	No	No	Yes	No	No
group_4062	hypothetical protein	1	No	No	Yes	No	No
group_4063	hypothetical protein	1	No	No	Yes	No	No
group_4064	hypothetical protein	1	No	No	Yes	No	No
group_4065	hypothetical protein	1	No	No	Yes	No	No
group_4066	hypothetical protein	1	No	No	Yes	No	No
group_4067	hypothetical protein	1	No	No	Yes	No	No
group_4068	hypothetical protein	1	No	No	Yes	No	No
group_4069	hypothetical protein	1	No	No	Yes	No	No
group_4070	hypothetical protein	1	No	No	Yes	No	No
group_4071	hypothetical protein	1	No	No	Yes	No	No
group_4072	hypothetical protein	1	No	No	Yes	No	No
group_4073	hypothetical protein	1	No	No	Yes	No	No
group_4074	hypothetical protein	1	No	No	Yes	No	No
group_4075	hypothetical protein	1	No	No	Yes	No	No
hin_1	DNA-invertase hin	1	No	No	Yes	No	No
group_4077	hypothetical protein	1	No	No	Yes	No	No
group_4078	hypothetical protein	1	No	No	Yes	No	No
group_4079	hypothetical protein	1	No	No	Yes	No	No
group_4080	hypothetical protein	1	No	No	Yes	No	No
group_4081	hypothetical protein	1	No	No	Yes	No	No
group_4082	hypothetical protein	1	No	No	Yes	No	No
group_4083	Putative prophage phiRv2 integrase	1	No	No	Yes	No	No
group_41	hypothetical protein	1	No	No	No	Yes	No
pks2_1	Phthioceranic/hydroxyphthioceranic acid synthase	1	No	No	Yes	No	No
pks2_3	Phthioceranic/hydroxyphthioceranic acid synthase	1	No	No	No	Yes	No
ydaD_2	General stress protein 39	1	No	No	No	Yes	No
group_45	hypothetical protein	1	No	No	No	Yes	No
group_453	hypothetical protein	1	No	No	No	Yes	No
group_4748	hypothetical protein	1	No	No	No	Yes	No
group_4749	hypothetical protein	1	No	No	No	Yes	No
group_4750	hypothetical protein	1	No	No	No	Yes	No
group_4751	hypothetical protein	1	No	No	No	Yes	No
group_4752	hypothetical protein	1	No	No	No	Yes	No
group_4753	hypothetical protein	1	No	No	No	Yes	No
group_4754	hypothetical protein	1	No	No	No	Yes	No
group_4755	hypothetical protein	1	No	No	No	Yes	No
group_4756	hypothetical protein	1	No	No	No	Yes	No
group_4757	hypothetical protein	1	No	No	No	Yes	No
group_4758	hypothetical protein	1	No	No	No	Yes	No
group_4759	hypothetical protein	1	No	No	No	Yes	No
group_4760	hypothetical protein	1	No	No	No	Yes	No
group_4763	hypothetical protein	1	No	No	No	Yes	No
group_4764	hypothetical protein	1	No	No	No	Yes	No
group_4765	hypothetical protein	1	No	No	No	Yes	No
group_4766	hypothetical protein	1	No	No	No	Yes	No
group_4767	hypothetical protein	1	No	No	No	Yes	No
group_4768	hypothetical protein	1	No	No	No	Yes	No
group_4769	hypothetical protein	1	No	No	No	Yes	No
group_4770	hypothetical protein	1	No	No	No	Yes	No
group_4771	hypothetical protein	1	No	No	No	Yes	No
group_4772	hypothetical protein	1	No	No	No	Yes	No
group_4773	hypothetical protein	1	No	No	No	Yes	No
group_4774	hypothetical protein	1	No	No	No	Yes	No
group_4775	hypothetical protein	1	No	No	No	Yes	No
group_4776	hypothetical protein	1	No	No	No	Yes	No
group_4777	hypothetical protein	1	No	No	No	Yes	No
group_4778	hypothetical protein	1	No	No	No	Yes	No
group_4779	hypothetical protein	1	No	No	No	Yes	No
group_4780	hypothetical protein	1	No	No	No	Yes	No
group_4781	hypothetical protein	1	No	No	No	Yes	No
group_4782	hypothetical protein	1	No	No	No	Yes	No
rslA_2	Anti-sigma-L factor RslA	1	No	No	No	Yes	No
group_4785	hypothetical protein	1	No	No	No	Yes	No
group_4787	hypothetical protein	1	No	No	No	Yes	No
group_4788	hypothetical protein	1	No	No	No	Yes	No
group_4789	hypothetical protein	1	No	No	No	Yes	No
mmcO_1	Multicopper oxidase MmcO	1	No	No	No	Yes	No
rebM_1	Demethylrebeccamycin-D-glucose O-methyltransferase	1	No	No	No	Yes	No
group_4792	hypothetical protein	1	No	No	No	Yes	No
group_4796	hypothetical protein	1	No	No	No	Yes	No
group_4797	putative PE-PGRS family protein PE_PGRS24	1	No	No	No	Yes	No
group_4798	putative PPE family protein PPE29	1	No	No	No	Yes	No
group_4799	Putative ESAT-6-like protein 7	1	No	No	No	Yes	No
group_4800	hypothetical protein	1	No	No	No	Yes	No
group_4801	hypothetical protein	1	No	No	No	Yes	No
group_4802	hypothetical protein	1	No	No	No	Yes	No
mycG	Mycinamicin IV hydroxylase/epoxidase	1	No	No	No	Yes	No
group_4804	hypothetical protein	1	No	No	No	Yes	No
group_4805	3 beta-hydroxysteroid dehydrogenase/Delta 5-->4-isomerase	1	No	No	No	Yes	No
ssuD_1	Alkanesulfonate monooxygenase	1	No	No	No	Yes	No
group_4808	F420H(2)-dependent quinone reductase	1	No	No	No	Yes	No
group_4810	hypothetical protein	1	No	No	No	Yes	No
group_4812	hypothetical protein	1	No	No	No	Yes	No
group_4814	NADH-quinone oxidoreductase subunit 12	1	No	No	No	Yes	No
group_4817	hypothetical protein	1	No	No	No	Yes	No
group_4818	hypothetical protein	1	No	No	No	Yes	No
group_4820	hypothetical protein	1	No	No	No	Yes	No
group_4821	hypothetical protein	1	No	No	No	Yes	No
group_4822	hypothetical protein	1	No	No	No	Yes	No
group_4823	hypothetical protein	1	No	No	No	Yes	No
group_4824	hypothetical protein	1	No	No	No	Yes	No
group_4825	hypothetical protein	1	No	No	No	Yes	No
group_4826	hypothetical protein	1	No	No	No	Yes	No
group_4827	hypothetical protein	1	No	No	No	Yes	No
group_4828	hypothetical protein	1	No	No	No	Yes	No
group_4829	hypothetical protein	1	No	No	No	Yes	No
group_4830	hypothetical protein	1	No	No	No	Yes	No
group_4833	hypothetical protein	1	No	No	No	Yes	No
group_4834	hypothetical protein	1	No	No	No	Yes	No
group_4835	hypothetical protein	1	No	No	No	Yes	No
group_4836	hypothetical protein	1	No	No	No	Yes	No
group_4837	hypothetical protein	1	No	No	No	Yes	No
group_4838	hypothetical protein	1	No	No	No	Yes	No
group_4839	hypothetical protein	1	No	No	No	Yes	No
group_4840	hypothetical protein	1	No	No	No	Yes	No
group_4841	hypothetical protein	1	No	No	No	Yes	No
group_4842	hypothetical protein	1	No	No	No	Yes	No
group_4843	hypothetical protein	1	No	No	No	Yes	No
group_4844	hypothetical protein	1	No	No	No	Yes	No
group_4845	hypothetical protein	1	No	No	No	Yes	No
group_4846	hypothetical protein	1	No	No	No	Yes	No
group_4847	hypothetical protein	1	No	No	No	Yes	No
group_4848	hypothetical protein	1	No	No	No	Yes	No
group_4849	hypothetical protein	1	No	No	No	Yes	No
group_4850	hypothetical protein	1	No	No	No	Yes	No
group_4851	hypothetical protein	1	No	No	No	Yes	No
group_4852	hypothetical protein	1	No	No	No	Yes	No
group_4853	hypothetical protein	1	No	No	No	Yes	No
group_4854	hypothetical protein	1	No	No	No	Yes	No
group_4855	putative PPE family protein PPE32	1	No	No	No	Yes	No
group_4858	hypothetical protein	1	No	No	No	Yes	No
group_4859	hypothetical protein	1	No	No	No	Yes	No
group_4860	hypothetical protein	1	No	No	No	Yes	No
group_4861	hypothetical protein	1	No	No	No	Yes	No
group_4862	hypothetical protein	1	No	No	No	Yes	No
group_4863	hypothetical protein	1	No	No	No	Yes	No
group_4864	hypothetical protein	1	No	No	No	Yes	No
group_4865	hypothetical protein	1	No	No	No	Yes	No
group_4866	hypothetical protein	1	No	No	No	Yes	No
group_4867	hypothetical protein	1	No	No	No	Yes	No
group_4868	hypothetical protein	1	No	No	No	Yes	No
group_4869	hypothetical protein	1	No	No	No	Yes	No
group_4870	hypothetical protein	1	No	No	No	Yes	No
group_4871	hypothetical protein	1	No	No	No	Yes	No
group_4872	hypothetical protein	1	No	No	No	Yes	No
group_4873	hypothetical protein	1	No	No	No	Yes	No
group_4874	hypothetical protein	1	No	No	No	Yes	No
group_4875	hypothetical protein	1	No	No	No	Yes	No
group_4876	hypothetical protein	1	No	No	No	Yes	No
group_4877	hypothetical protein	1	No	No	No	Yes	No
group_4878	hypothetical protein	1	No	No	No	Yes	No
group_4879	hypothetical protein	1	No	No	No	Yes	No
group_4880	hypothetical protein	1	No	No	No	Yes	No
mutT4_1	Putative mutator protein MutT4	1	No	No	No	Yes	No
group_4882	hypothetical protein	1	No	No	No	Yes	No
group_4883	hypothetical protein	1	No	No	No	Yes	No
group_4885	hypothetical protein	1	No	No	No	Yes	No
group_4886	hypothetical protein	1	No	No	No	Yes	No
group_4887	hypothetical protein	1	No	No	No	Yes	No
group_4888	hypothetical protein	1	No	No	No	Yes	No
group_4889	hypothetical protein	1	No	No	No	Yes	No
rfaQ_2	Lipopolysaccharide core heptosyltransferase RfaQ	1	No	No	No	Yes	No
group_4890	hypothetical protein	1	No	No	No	Yes	No
group_4891	hypothetical protein	1	No	No	No	Yes	No
group_4892	hypothetical protein	1	No	No	No	Yes	No
group_4893	hypothetical protein	1	No	No	No	Yes	No
group_4894	hypothetical protein	1	No	No	No	Yes	No
group_4896	hypothetical protein	1	No	No	No	Yes	No
group_4897	hypothetical protein	1	No	No	No	Yes	No
group_4898	hypothetical protein	1	No	No	No	Yes	No
group_4899	hypothetical protein	1	No	No	No	Yes	No
sbnA_2	putative siderophore biosynthesis protein SbnA	1	No	No	No	Yes	No
group_4901	hypothetical protein	1	No	No	No	Yes	No
group_4903	hypothetical protein	1	No	No	No	Yes	No
group_4904	hypothetical protein	1	No	No	No	Yes	No
group_4906	hypothetical protein	1	No	No	No	Yes	No
group_4907	hypothetical protein	1	No	No	No	Yes	No
group_4908	hypothetical protein	1	No	No	No	Yes	No
group_4909	hypothetical protein	1	No	No	No	Yes	No
acoC	Dihydrolipoyllysine-residue acetyltransferase component of acetoin cleaving system	1	No	No	No	Yes	No
group_4913	hypothetical protein	1	No	No	No	Yes	No
group_4918	hypothetical protein	1	No	No	No	Yes	No
group_4919	hypothetical protein	1	No	No	No	Yes	No
dhbF_2	Dimodular nonribosomal peptide synthase	1	No	No	No	Yes	No
mbtB_2	Phenyloxazoline synthase MbtB	1	No	No	No	Yes	No
group_4924	Putative inactive phenolphthiocerol synthesis polyketide synthase type I Pks15	1	No	No	No	Yes	No
eryA_3	Erythronolide synthase; modules 5 and 6	1	No	No	No	Yes	No
group_4926	hypothetical protein	1	No	No	No	Yes	No
group_4927	hypothetical protein	1	No	No	No	Yes	No
group_4928	hypothetical protein	1	No	No	No	Yes	No
group_4929	hypothetical protein	1	No	No	No	Yes	No
group_4930	hypothetical protein	1	No	No	No	Yes	No
group_4931	hypothetical protein	1	No	No	No	Yes	No
group_4932	hypothetical protein	1	No	No	No	Yes	No
group_4933	hypothetical protein	1	No	No	No	Yes	No
group_4934	hypothetical protein	1	No	No	No	Yes	No
group_4935	hypothetical protein	1	No	No	No	Yes	No
group_4936	hypothetical protein	1	No	No	No	Yes	No
group_4937	hypothetical protein	1	No	No	No	Yes	No
group_4938	hypothetical protein	1	No	No	No	Yes	No
group_4939	hypothetical protein	1	No	No	No	Yes	No
group_4940	hypothetical protein	1	No	No	No	Yes	No
group_4941	hypothetical protein	1	No	No	No	Yes	No
group_4942	hypothetical protein	1	No	No	No	Yes	No
group_4944	hypothetical protein	1	No	No	No	Yes	No
group_4945	hypothetical protein	1	No	No	No	Yes	No
group_4946	hypothetical protein	1	No	No	No	Yes	No
group_4947	hypothetical protein	1	No	No	No	Yes	No
group_4948	hypothetical protein	1	No	No	No	Yes	No
group_4949	hypothetical protein	1	No	No	No	Yes	No
group_4950	hypothetical protein	1	No	No	No	Yes	No
group_4951	hypothetical protein	1	No	No	No	Yes	No
group_4952	hypothetical protein	1	No	No	No	Yes	No
group_4953	hypothetical protein	1	No	No	No	Yes	No
group_4954	MPT51/MPB51 antigen	1	No	No	No	Yes	No
mkl_1	putative ribonucleotide transport ATP-binding protein mkl	1	No	No	No	Yes	No
group_4959	hypothetical protein	1	No	No	No	Yes	No
group_4960	hypothetical protein	1	No	No	No	Yes	No
group_4961	Peroxiredoxin	1	No	No	No	Yes	No
yxaF_1	putative HTH-type transcriptional regulator YxaF	1	No	No	No	Yes	No
group_4963	hypothetical protein	1	No	No	No	Yes	No
group_4964	hypothetical protein	1	No	No	No	Yes	No
group_4965	hypothetical protein	1	No	No	No	Yes	No
ssuA_2	Putative aliphatic sulfonates-binding protein	1	No	No	No	Yes	No
ssuC_1	Putative aliphatic sulfonates transport permease protein SsuC	1	No	No	No	Yes	No
ssuB_1	Aliphatic sulfonates import ATP-binding protein SsuB	1	No	No	No	Yes	No
group_4970	hypothetical protein	1	No	No	No	Yes	No
group_4972	hypothetical protein	1	No	No	No	Yes	No
group_4974	hypothetical protein	1	No	No	No	Yes	No
group_4976	hypothetical protein	1	No	No	No	Yes	No
group_4978	putative HTH-type transcriptional regulator	1	No	No	No	Yes	No
group_4979	hypothetical protein	1	No	No	No	Yes	No
dhmA2	Haloalkane dehalogenase 2	1	No	No	No	Yes	No
group_4982	hypothetical protein	1	No	No	No	Yes	No
group_4984	hypothetical protein	1	No	No	No	Yes	No
group_4985	hypothetical protein	1	No	No	No	Yes	No
group_4987	hypothetical protein	1	No	No	No	Yes	No
group_4988	hypothetical protein	1	No	No	No	Yes	No
group_4989	hypothetical protein	1	No	No	No	Yes	No
group_4990	hypothetical protein	1	No	No	No	Yes	No
group_4991	hypothetical protein	1	No	No	No	Yes	No
group_4992	hypothetical protein	1	No	No	No	Yes	No
group_4993	hypothetical protein	1	No	No	No	Yes	No
group_4994	hypothetical protein	1	No	No	No	Yes	No
group_4995	hypothetical protein	1	No	No	No	Yes	No
group_4996	hypothetical protein	1	No	No	No	Yes	No
group_4997	hypothetical protein	1	No	No	No	Yes	No
group_4998	hypothetical protein	1	No	No	No	Yes	No
group_4999	hypothetical protein	1	No	No	No	Yes	No
group_5000	hypothetical protein	1	No	No	No	Yes	No
group_5001	hypothetical protein	1	No	No	No	Yes	No
group_5002	hypothetical protein	1	No	No	No	Yes	No
group_5003	hypothetical protein	1	No	No	No	Yes	No
group_5004	hypothetical protein	1	No	No	No	Yes	No
group_5005	hypothetical protein	1	No	No	No	Yes	No
group_5007	hypothetical protein	1	No	No	No	Yes	No
group_5009	Putative short-chain type dehydrogenase/reductase/MSMEI_5872	1	No	No	No	Yes	No
group_5010	Putative short-chain type dehydrogenase/reductase/MSMEI_5872	1	No	No	No	Yes	No
group_5011	Putative short-chain type dehydrogenase/reductase/MSMEI_5872	1	No	No	No	Yes	No
group_5012	hypothetical protein	1	No	No	No	Yes	No
group_5013	hypothetical protein	1	No	No	No	Yes	No
group_5014	hypothetical protein	1	No	No	No	Yes	No
group_5015	hypothetical protein	1	No	No	No	Yes	No
group_5016	hypothetical protein	1	No	No	No	Yes	No
group_5017	hypothetical protein	1	No	No	No	Yes	No
group_5018	hypothetical protein	1	No	No	No	Yes	No
group_5019	hypothetical protein	1	No	No	No	Yes	No
group_5020	hypothetical protein	1	No	No	No	Yes	No
group_5021	hypothetical protein	1	No	No	No	Yes	No
group_5022	hypothetical protein	1	No	No	No	Yes	No
group_5023	hypothetical protein	1	No	No	No	Yes	No
group_5024	hypothetical protein	1	No	No	No	Yes	No
group_5025	hypothetical protein	1	No	No	No	Yes	No
group_5026	hypothetical protein	1	No	No	No	Yes	No
group_5027	hypothetical protein	1	No	No	No	Yes	No
group_5028	hypothetical protein	1	No	No	No	Yes	No
group_5029	hypothetical protein	1	No	No	No	Yes	No
group_5030	hypothetical protein	1	No	No	No	Yes	No
group_5035	hypothetical protein	1	No	No	No	Yes	No
group_5036	hypothetical protein	1	No	No	No	Yes	No
group_5037	hypothetical protein	1	No	No	No	Yes	No
group_5038	hypothetical protein	1	No	No	No	Yes	No
group_5039	hypothetical protein	1	No	No	No	Yes	No
group_5041	hypothetical protein	1	No	No	No	Yes	No
group_5042	hypothetical protein	1	No	No	No	Yes	No
group_5043	hypothetical protein	1	No	No	No	Yes	No
group_5045	hypothetical protein	1	No	No	No	Yes	No
group_5046	hypothetical protein	1	No	No	No	Yes	No
group_5047	hypothetical protein	1	No	No	No	Yes	No
group_5048	hypothetical protein	1	No	No	No	Yes	No
group_5049	hypothetical protein	1	No	No	No	Yes	No
group_5050	hypothetical protein	1	No	No	No	Yes	No
group_5051	hypothetical protein	1	No	No	No	Yes	No
group_5052	hypothetical protein	1	No	No	No	Yes	No
group_5053	hypothetical protein	1	No	No	No	Yes	No
group_5054	hypothetical protein	1	No	No	No	Yes	No
group_5055	hypothetical protein	1	No	No	No	Yes	No
group_5056	hypothetical protein	1	No	No	No	Yes	No
group_5059	hypothetical protein	1	No	No	No	Yes	No
group_5060	hypothetical protein	1	No	No	No	Yes	No
group_5061	hypothetical protein	1	No	No	No	Yes	No
group_5068	hypothetical protein	1	No	No	No	Yes	No
group_5069	hypothetical protein	1	No	No	No	Yes	No
group_5070	hypothetical protein	1	No	No	No	Yes	No
group_5071	hypothetical protein	1	No	No	No	Yes	No
group_5072	hypothetical protein	1	No	No	No	Yes	No
group_5073	hypothetical protein	1	No	No	No	Yes	No
group_5075	hypothetical protein	1	No	No	No	Yes	No
group_5076	hypothetical protein	1	No	No	No	Yes	No
group_5077	hypothetical protein	1	No	No	No	Yes	No
group_5078	hypothetical protein	1	No	No	No	Yes	No
apr_1	Subtilisin DY	1	No	No	No	Yes	No
eccD5_1	ESX-5 secretion system protein EccD5	1	No	No	No	Yes	No
espI_2	ESX-1 secretion-associated protein EspI	1	No	No	No	Yes	No
group_5082	hypothetical protein	1	No	No	No	Yes	No
group_5083	hypothetical protein	1	No	No	No	Yes	No
group_5084	hypothetical protein	1	No	No	No	Yes	No
group_5085	putative PPE family protein PPE29	1	No	No	No	Yes	No
group_5086	hypothetical protein	1	No	No	No	Yes	No
eccC5_3	ESX-5 secretion system protein EccC5	1	No	No	No	Yes	No
eccB5_2	ESX-5 secretion system protein EccB5	1	No	No	No	Yes	No
group_5090	hypothetical protein	1	No	No	No	Yes	No
group_5091	hypothetical protein	1	No	No	No	Yes	No
group_5092	hypothetical protein	1	No	No	No	Yes	No
group_5093	hypothetical protein	1	No	No	No	Yes	No
group_5094	hypothetical protein	1	No	No	No	Yes	No
group_5095	hypothetical protein	1	No	No	No	Yes	No
group_5096	hypothetical protein	1	No	No	No	Yes	No
group_5097	hypothetical protein	1	No	No	No	Yes	No
group_5098	hypothetical protein	1	No	No	No	Yes	No
group_5099	hypothetical protein	1	No	No	No	Yes	No
group_5101	Baeyer-Villiger monooxygenase	1	No	No	No	Yes	No
group_5102	Baeyer-Villiger monooxygenase	1	No	No	No	Yes	No
group_5103	hypothetical protein	1	No	No	No	Yes	No
group_5105	hypothetical protein	1	No	No	No	Yes	No
betI_3	HTH-type transcriptional regulator BetI	1	No	No	No	Yes	No
group_5107	hypothetical protein	1	No	No	No	Yes	No
group_5108	Putative coenzyme F420-dependent oxidoreductase	1	No	No	No	Yes	No
fdx_3	Ferredoxin	1	No	No	No	Yes	No
group_5110	Methyl-branched lipid omega-hydroxylase	1	No	No	No	Yes	No
group_5111	hypothetical protein	1	No	No	No	Yes	No
group_5113	hypothetical protein	1	No	No	No	Yes	No
group_5116	putative HTH-type transcriptional regulator	1	No	No	No	Yes	No
group_5117	hypothetical protein	1	No	No	No	Yes	No
group_5122	hypothetical protein	1	No	No	No	Yes	No
group_5124	hypothetical protein	1	No	No	No	Yes	No
group_5125	hypothetical protein	1	No	No	No	Yes	No
group_5126	hypothetical protein	1	No	No	No	Yes	No
group_5127	hypothetical protein	1	No	No	No	Yes	No
group_5128	hypothetical protein	1	No	No	No	Yes	No
group_5130	hypothetical protein	1	No	No	No	Yes	No
group_5131	hypothetical protein	1	No	No	No	Yes	No
group_5132	Insertion sequence putative ATP-binding protein	1	No	No	No	Yes	No
group_5133	hypothetical protein	1	No	No	No	Yes	No
group_5134	hypothetical protein	1	No	No	No	Yes	No
group_5136	hypothetical protein	1	No	No	No	Yes	No
group_5137	hypothetical protein	1	No	No	No	Yes	No
group_5138	hypothetical protein	1	No	No	No	Yes	No
group_5139	hypothetical protein	1	No	No	No	Yes	No
group_5140	hypothetical protein	1	No	No	No	Yes	No
group_5141	hypothetical protein	1	No	No	No	Yes	No
group_5142	hypothetical protein	1	No	No	No	Yes	No
group_5143	hypothetical protein	1	No	No	No	Yes	No
group_5144	hypothetical protein	1	No	No	No	Yes	No
group_5145	hypothetical protein	1	No	No	No	Yes	No
group_5146	hypothetical protein	1	No	No	No	Yes	No
group_5147	hypothetical protein	1	No	No	No	Yes	No
group_5148	hypothetical protein	1	No	No	No	Yes	No
traI_1	Multifunctional conjugation protein TraI	1	No	No	No	Yes	No
group_5150	hypothetical protein	1	No	No	No	Yes	No
group_5151	hypothetical protein	1	No	No	No	Yes	No
group_5152	hypothetical protein	1	No	No	No	Yes	No
group_5153	hypothetical protein	1	No	No	No	Yes	No
group_5154	hypothetical protein	1	No	No	No	Yes	No
group_5155	hypothetical protein	1	No	No	No	Yes	No
hin_1	DNA-invertase hin	1	No	No	No	Yes	No
group_5157	hypothetical protein	1	No	No	No	Yes	No
group_5158	hypothetical protein	1	No	No	No	Yes	No
group_5159	hypothetical protein	1	No	No	No	Yes	No
group_5160	hypothetical protein	1	No	No	No	Yes	No
group_5161	hypothetical protein	1	No	No	No	Yes	No
group_5163	hypothetical protein	1	No	No	No	Yes	No
group_5164	hypothetical protein	1	No	No	No	Yes	No
group_5165	hypothetical protein	1	No	No	No	Yes	No
group_5166	hypothetical protein	1	No	No	No	Yes	No
group_5167	hypothetical protein	1	No	No	No	Yes	No
group_5168	hypothetical protein	1	No	No	No	Yes	No
group_5169	hypothetical protein	1	No	No	No	Yes	No
group_5170	hypothetical protein	1	No	No	No	Yes	No
group_5171	hypothetical protein	1	No	No	No	Yes	No
group_5172	hypothetical protein	1	No	No	No	Yes	No
group_5173	hypothetical protein	1	No	No	No	Yes	No
group_5174	hypothetical protein	1	No	No	No	Yes	No
group_5175	hypothetical protein	1	No	No	No	Yes	No
group_5176	hypothetical protein	1	No	No	No	Yes	No
group_5177	hypothetical protein	1	No	No	No	Yes	No
group_5178	hypothetical protein	1	No	No	No	Yes	No
group_5179	hypothetical protein	1	No	No	No	Yes	No
group_5181	hypothetical protein	1	No	No	No	Yes	No
group_5182	hypothetical protein	1	No	No	No	Yes	No
group_5183	hypothetical protein	1	No	No	No	Yes	No
group_5184	hypothetical protein	1	No	No	No	Yes	No
group_5185	hypothetical protein	1	No	No	No	Yes	No
group_5187	hypothetical protein	1	No	No	No	Yes	No
group_5188	hypothetical protein	1	No	No	No	Yes	No
group_5189	hypothetical protein	1	No	No	No	Yes	No
acrR_1	HTH-type transcriptional regulator AcrR	1	No	No	No	Yes	No
group_5195	hypothetical protein	1	No	No	No	Yes	No
group_5196	hypothetical protein	1	No	No	No	Yes	No
group_5197	hypothetical protein	1	No	No	No	Yes	No
group_52	hypothetical protein	1	No	No	No	Yes	No
group_5200	hypothetical protein	1	No	No	No	Yes	No
group_5201	hypothetical protein	1	No	No	No	Yes	No
group_5202	hypothetical protein	1	No	No	No	Yes	No
group_5203	hypothetical protein	1	No	No	No	Yes	No
group_5205	hypothetical protein	1	No	No	No	Yes	No
group_5206	hypothetical protein	1	No	No	No	Yes	No
group_5207	hypothetical protein	1	No	No	No	Yes	No
group_5210	hypothetical protein	1	No	No	No	Yes	No
group_5212	hypothetical protein	1	No	No	No	Yes	No
group_5214	hypothetical protein	1	No	No	No	Yes	No
group_5215	hypothetical protein	1	No	No	No	Yes	No
group_5217	hypothetical protein	1	No	No	No	Yes	No
group_5218	hypothetical protein	1	No	No	No	Yes	No
group_5219	hypothetical protein	1	No	No	No	Yes	No
ephD_8	putative oxidoreductase EphD	1	No	No	No	Yes	No
group_5221	hypothetical protein	1	No	No	No	Yes	No
group_5222	hypothetical protein	1	No	No	No	Yes	No
group_5223	Putative diacyglycerol O-acyltransferase	1	No	No	No	Yes	No
group_5224	hypothetical protein	1	No	No	No	Yes	No
group_5226	Ribonuclease VapC46	1	No	No	No	Yes	No
group_5227	Antitoxin VapB46	1	No	No	No	Yes	No
group_5228	hypothetical protein	1	No	No	No	Yes	No
group_5229	hypothetical protein	1	No	No	No	Yes	No
group_5230	hypothetical protein	1	No	No	No	Yes	No
group_5231	hypothetical protein	1	No	No	No	Yes	No
group_5232	hypothetical protein	1	No	No	No	Yes	No
group_5233	hypothetical protein	1	No	No	No	Yes	No
group_5235	hypothetical protein	1	No	No	No	Yes	No
group_5236	hypothetical protein	1	No	No	No	Yes	No
group_5237	hypothetical protein	1	No	No	No	Yes	No
group_5238	hypothetical protein	1	No	No	No	Yes	No
group_5239	hypothetical protein	1	No	No	No	Yes	No
group_5240	hypothetical protein	1	No	No	No	Yes	No
group_5241	hypothetical protein	1	No	No	No	Yes	No
group_5242	hypothetical protein	1	No	No	No	Yes	No
group_5243	hypothetical protein	1	No	No	No	Yes	No
group_5245	hypothetical protein	1	No	No	No	Yes	No
group_5246	hypothetical protein	1	No	No	No	Yes	No
group_5247	hypothetical protein	1	No	No	No	Yes	No
group_5248	hypothetical protein	1	No	No	No	Yes	No
group_5249	hypothetical protein	1	No	No	No	Yes	No
group_5250	hypothetical protein	1	No	No	No	Yes	No
group_5252	hypothetical protein	1	No	No	No	Yes	No
group_5253	hypothetical protein	1	No	No	No	Yes	No
group_5254	hypothetical protein	1	No	No	No	Yes	No
group_5255	hypothetical protein	1	No	No	No	Yes	No
group_5256	hypothetical protein	1	No	No	No	Yes	No
group_5257	hypothetical protein	1	No	No	No	Yes	No
group_5258	hypothetical protein	1	No	No	No	Yes	No
group_5259	hypothetical protein	1	No	No	No	Yes	No
group_5260	hypothetical protein	1	No	No	No	Yes	No
group_5261	hypothetical protein	1	No	No	No	Yes	No
group_5262	hypothetical protein	1	No	No	No	Yes	No
group_5264	hypothetical protein	1	No	No	No	Yes	No
group_5265	hypothetical protein	1	No	No	No	Yes	No
group_5266	hypothetical protein	1	No	No	No	Yes	No
group_5267	hypothetical protein	1	No	No	No	Yes	No
group_5268	hypothetical protein	1	No	No	No	Yes	No
group_5269	hypothetical protein	1	No	No	No	Yes	No
group_5270	hypothetical protein	1	No	No	No	Yes	No
group_5271	hypothetical protein	1	No	No	No	Yes	No
group_5272	hypothetical protein	1	No	No	No	Yes	No
group_5273	hypothetical protein	1	No	No	No	Yes	No
group_5274	hypothetical protein	1	No	No	No	Yes	No
group_5275	hypothetical protein	1	No	No	No	Yes	No
group_5276	hypothetical protein	1	No	No	No	Yes	No
group_5277	hypothetical protein	1	No	No	No	Yes	No
group_5278	hypothetical protein	1	No	No	No	Yes	No
group_5279	hypothetical protein	1	No	No	No	Yes	No
group_528	hypothetical protein	1	No	No	No	Yes	No
group_5280	hypothetical protein	1	No	No	No	Yes	No
group_5281	hypothetical protein	1	No	No	No	Yes	No
group_5282	hypothetical protein	1	No	No	No	Yes	No
group_5283	hypothetical protein	1	No	No	No	Yes	No
group_5285	hypothetical protein	1	No	No	No	Yes	No
group_5286	hypothetical protein	1	No	No	No	Yes	No
group_5287	hypothetical protein	1	No	No	No	Yes	No
group_5288	hypothetical protein	1	No	No	No	Yes	No
group_5289	hypothetical protein	1	No	No	No	Yes	No
group_5290	hypothetical protein	1	No	No	No	Yes	No
group_5292	hypothetical protein	1	No	No	No	Yes	No
group_5293	hypothetical protein	1	No	No	No	Yes	No
group_5294	hypothetical protein	1	No	No	No	Yes	No
group_5295	hypothetical protein	1	No	No	No	Yes	No
group_5296	hypothetical protein	1	No	No	No	Yes	No
lysA_3	Diaminopimelate decarboxylase	1	No	No	No	Yes	No
group_5300	Delta(1)-pyrroline-2-carboxylate reductase	1	No	No	No	Yes	No
ricR_2	Copper-sensing transcriptional repressor RicR	1	No	No	No	Yes	No
group_5304	putative PPE family protein PPE32	1	No	No	No	Yes	No
group_5305	hypothetical protein	1	No	No	No	Yes	No
ctpA	Cation-transporting P-type ATPase A	1	No	No	No	Yes	No
copZ	Copper chaperone CopZ	1	No	No	No	Yes	No
group_5308	Putative coenzyme F420-dependent oxidoreductase	1	No	No	No	Yes	No
group_5309	Methyl-branched lipid omega-hydroxylase	1	No	No	No	Yes	No
group_5311	putative monooxygenase	1	No	No	No	Yes	No
group_5312	hypothetical protein	1	No	No	No	Yes	No
lcfB_8	Long-chain-fatty-acid--CoA ligase	1	No	No	No	Yes	No
dpgD_4	Enoyl-CoA-hydratase	1	No	No	No	Yes	No
mmgC_13	Acyl-CoA dehydrogenase	1	No	No	No	Yes	No
lcfB_9	Long-chain-fatty-acid--CoA ligase	1	No	No	No	Yes	No
group_5318	hypothetical protein	1	No	No	No	Yes	No
group_5319	hypothetical protein	1	No	No	No	Yes	No
group_5320	hypothetical protein	1	No	No	No	Yes	No
group_5321	hypothetical protein	1	No	No	No	Yes	No
mlaE_11	putative phospholipid ABC transporter permease protein MlaE	1	No	No	No	Yes	No
mlaE_12	putative phospholipid ABC transporter permease protein MlaE	1	No	No	No	Yes	No
group_5324	hypothetical protein	1	No	No	No	Yes	No
group_5325	hypothetical protein	1	No	No	No	Yes	No
group_5326	hypothetical protein	1	No	No	No	Yes	No
group_5327	hypothetical protein	1	No	No	No	Yes	No
group_5328	hypothetical protein	1	No	No	No	Yes	No
group_5329	hypothetical protein	1	No	No	No	Yes	No
group_5330	hypothetical protein	1	No	No	No	Yes	No
group_5331	hypothetical protein	1	No	No	No	Yes	No
group_5332	hypothetical protein	1	No	No	No	Yes	No
group_5333	hypothetical protein	1	No	No	No	Yes	No
group_5334	hypothetical protein	1	No	No	No	Yes	No
group_5335	hypothetical protein	1	No	No	No	Yes	No
group_5336	hypothetical protein	1	No	No	No	Yes	No
group_5337	hypothetical protein	1	No	No	No	Yes	No
group_5338	hypothetical protein	1	No	No	No	Yes	No
group_5339	hypothetical protein	1	No	No	No	Yes	No
group_5343	Ferredoxin	1	No	No	No	Yes	No
group_5344	hypothetical protein	1	No	No	No	Yes	No
group_5345	hypothetical protein	1	No	No	No	Yes	No
group_5346	Insertion sequence putative ATP-binding protein	1	No	No	No	Yes	No
group_5347	hypothetical protein	1	No	No	No	Yes	No
group_5348	hypothetical protein	1	No	No	No	Yes	No
group_5351	Putative esterase	1	No	No	No	Yes	No
group_5352	putative HTH-type transcriptional regulator	1	No	No	No	Yes	No
group_5353	hypothetical protein	1	No	No	No	Yes	No
adh	putative alcohol dehydrogenase adh	1	No	No	No	Yes	No
group_5357	hypothetical protein	1	No	No	No	Yes	No
group_5358	hypothetical protein	1	No	No	No	Yes	No
group_5359	hypothetical protein	1	No	No	No	Yes	No
group_5361	hypothetical protein	1	No	No	No	Yes	No
group_5362	hypothetical protein	1	No	No	No	Yes	No
group_5363	hypothetical protein	1	No	No	No	Yes	No
group_5364	hypothetical protein	1	No	No	No	Yes	No
group_5365	hypothetical protein	1	No	No	No	Yes	No
group_5366	hypothetical protein	1	No	No	No	Yes	No
group_5367	hypothetical protein	1	No	No	No	Yes	No
group_5368	hypothetical protein	1	No	No	No	Yes	No
group_5369	hypothetical protein	1	No	No	No	Yes	No
group_5370	hypothetical protein	1	No	No	No	Yes	No
group_5371	hypothetical protein	1	No	No	No	Yes	No
group_5372	hypothetical protein	1	No	No	No	Yes	No
group_5373	hypothetical protein	1	No	No	No	Yes	No
group_5374	hypothetical protein	1	No	No	No	Yes	No
group_5375	hypothetical protein	1	No	No	No	Yes	No
group_5376	hypothetical protein	1	No	No	No	Yes	No
group_5377	hypothetical protein	1	No	No	No	Yes	No
group_5379	hypothetical protein	1	No	No	No	Yes	No
group_5380	hypothetical protein	1	No	No	No	Yes	No
group_5381	hypothetical protein	1	No	No	No	Yes	No
group_5382	hypothetical protein	1	No	No	No	Yes	No
group_5383	hypothetical protein	1	No	No	No	Yes	No
group_5384	hypothetical protein	1	No	No	No	Yes	No
group_5385	hypothetical protein	1	No	No	No	Yes	No
group_5387	hypothetical protein	1	No	No	No	Yes	No
group_5388	hypothetical protein	1	No	No	No	Yes	No
group_5389	hypothetical protein	1	No	No	No	Yes	No
group_5390	hypothetical protein	1	No	No	No	Yes	No
group_5391	hypothetical protein	1	No	No	No	Yes	No
group_5394	hypothetical protein	1	No	No	No	Yes	No
group_5395	hypothetical protein	1	No	No	No	Yes	No
group_5396	hypothetical protein	1	No	No	No	Yes	No
group_5398	hypothetical protein	1	No	No	No	Yes	No
group_5399	hypothetical protein	1	No	No	No	Yes	No
group_54	hypothetical protein	1	No	No	No	Yes	No
group_5400	hypothetical protein	1	No	No	No	Yes	No
group_5401	hypothetical protein	1	No	No	No	Yes	No
group_5402	hypothetical protein	1	No	No	No	Yes	No
group_5404	hypothetical protein	1	No	No	No	Yes	No
group_5405	hypothetical protein	1	No	No	No	Yes	No
group_5406	hypothetical protein	1	No	No	No	Yes	No
group_5408	hypothetical protein	1	No	No	No	Yes	No
group_5409	hypothetical protein	1	No	No	No	Yes	No
group_5410	hypothetical protein	1	No	No	No	Yes	No
group_5418	hypothetical protein	1	No	No	No	Yes	No
group_5419	hypothetical protein	1	No	No	No	Yes	No
group_5420	hypothetical protein	1	No	No	No	Yes	No
group_5421	hypothetical protein	1	No	No	No	Yes	No
group_5422	hypothetical protein	1	No	No	No	Yes	No
group_5423	hypothetical protein	1	No	No	No	Yes	No
group_5424	hypothetical protein	1	No	No	No	Yes	No
group_5425	hypothetical protein	1	No	No	No	Yes	No
group_5426	hypothetical protein	1	No	No	No	Yes	No
group_5427	hypothetical protein	1	No	No	No	Yes	No
group_5428	hypothetical protein	1	No	No	No	Yes	No
group_5429	hypothetical protein	1	No	No	No	Yes	No
group_5430	hypothetical protein	1	No	No	No	Yes	No
group_5431	hypothetical protein	1	No	No	No	Yes	No
group_5432	hypothetical protein	1	No	No	No	Yes	No
group_5433	hypothetical protein	1	No	No	No	Yes	No
group_5434	hypothetical protein	1	No	No	No	Yes	No
sadH_1	Putative oxidoreductase SadH	1	No	No	No	Yes	No
group_5436	hypothetical protein	1	No	No	No	Yes	No
group_5437	hypothetical protein	1	No	No	No	Yes	No
group_5438	Baeyer-Villiger monooxygenase	1	No	No	No	Yes	No
ephD_9	putative oxidoreductase EphD	1	No	No	No	Yes	No
group_5440	hypothetical protein	1	No	No	No	Yes	No
group_5441	hypothetical protein	1	No	No	No	Yes	No
group_5442	hypothetical protein	1	No	No	No	Yes	No
group_5445	hypothetical protein	1	No	No	No	Yes	No
group_5446	hypothetical protein	1	No	No	No	Yes	No
group_5447	hypothetical protein	1	No	No	No	Yes	No
group_5449	hypothetical protein	1	No	No	No	Yes	No
group_5451	hypothetical protein	1	No	No	No	Yes	No
group_5454	hypothetical protein	1	No	No	No	Yes	No
group_5455	hypothetical protein	1	No	No	No	Yes	No
group_5456	hypothetical protein	1	No	No	No	Yes	No
group_5457	hypothetical protein	1	No	No	No	Yes	No
group_5458	hypothetical protein	1	No	No	No	Yes	No
group_5459	hypothetical protein	1	No	No	No	Yes	No
group_5460	hypothetical protein	1	No	No	No	Yes	No
group_5461	hypothetical protein	1	No	No	No	Yes	No
group_5462	hypothetical protein	1	No	No	No	Yes	No
group_5463	hypothetical protein	1	No	No	No	Yes	No
group_5464	hypothetical protein	1	No	No	No	Yes	No
group_5465	hypothetical protein	1	No	No	No	Yes	No
group_5466	hypothetical protein	1	No	No	No	Yes	No
group_5472	hypothetical protein	1	No	No	No	Yes	No
group_5473	hypothetical protein	1	No	No	No	Yes	No
ssb_2	Single-stranded DNA-binding protein	1	No	No	No	Yes	No
group_5478	hypothetical protein	1	No	No	No	Yes	No
group_5480	hypothetical protein	1	No	No	No	Yes	No
group_5481	hypothetical protein	1	No	No	No	Yes	No
group_5482	hypothetical protein	1	No	No	No	Yes	No
nrdH_2	Glutaredoxin-like protein NrdH	1	No	No	No	Yes	No
group_5484	hypothetical protein	1	No	No	No	Yes	No
group_5485	hypothetical protein	1	No	No	No	Yes	No
group_5486	hypothetical protein	1	No	No	No	Yes	No
group_5487	hypothetical protein	1	No	No	No	Yes	No
group_5488	hypothetical protein	1	No	No	No	Yes	No
group_5489	hypothetical protein	1	No	No	No	Yes	No
group_5490	hypothetical protein	1	No	No	No	Yes	No
group_5491	hypothetical protein	1	No	No	No	Yes	No
group_5492	hypothetical protein	1	No	No	No	Yes	No
group_5493	hypothetical protein	1	No	No	No	Yes	No
group_5494	hypothetical protein	1	No	No	No	Yes	No
group_5495	hypothetical protein	1	No	No	No	Yes	No
group_5496	hypothetical protein	1	No	No	No	Yes	No
group_5498	hypothetical protein	1	No	No	No	Yes	No
group_5499	hypothetical protein	1	No	No	No	Yes	No
group_5500	hypothetical protein	1	No	No	No	Yes	No
group_5501	hypothetical protein	1	No	No	No	Yes	No
group_5502	putative HTH-type transcriptional regulator	1	No	No	No	Yes	No
group_5503	Acyltrehalose exporter MmpL10	1	No	No	No	Yes	No
group_5504	2-(acetamidomethylene)succinate hydrolase	1	No	No	No	Yes	No
group_5505	hypothetical protein	1	No	No	No	Yes	No
kstR_3	HTH-type transcriptional repressor KstR	1	No	No	No	Yes	No
group_5507	hypothetical protein	1	No	No	No	Yes	No
group_5508	hypothetical protein	1	No	No	No	Yes	No
group_5512	hypothetical protein	1	No	No	No	Yes	No
group_5513	hypothetical protein	1	No	No	No	Yes	No
group_5514	hypothetical protein	1	No	No	No	Yes	No
group_5515	hypothetical protein	1	No	No	No	Yes	No
ethA_1	FAD-containing monooxygenase EthA	1	No	No	No	Yes	No
group_5517	hypothetical protein	1	No	No	No	Yes	No
group_5518	hypothetical protein	1	No	No	No	Yes	No
group_5520	hypothetical protein	1	No	No	No	Yes	No
group_5521	hypothetical protein	1	No	No	No	Yes	No
group_5522	hypothetical protein	1	No	No	No	Yes	No
group_5527	hypothetical protein	1	No	No	No	Yes	No
group_5529	hypothetical protein	1	No	No	No	Yes	No
group_5530	hypothetical protein	1	No	No	No	Yes	No
group_5531	hypothetical protein	1	No	No	No	Yes	No
group_5532	hypothetical protein	1	No	No	No	Yes	No
group_5533	hypothetical protein	1	No	No	No	Yes	No
group_5534	hypothetical protein	1	No	No	No	Yes	No
group_5535	hypothetical protein	1	No	No	No	Yes	No
group_5536	hypothetical protein	1	No	No	No	Yes	No
group_5537	hypothetical protein	1	No	No	No	Yes	No
group_5541	hypothetical protein	1	No	No	No	Yes	No
group_5543	hypothetical protein	1	No	No	No	Yes	No
group_5544	hypothetical protein	1	No	No	No	Yes	No
group_5545	hypothetical protein	1	No	No	No	Yes	No
group_5546	hypothetical protein	1	No	No	No	Yes	No
group_5547	hypothetical protein	1	No	No	No	Yes	No
group_5548	hypothetical protein	1	No	No	No	Yes	No
group_5549	hypothetical protein	1	No	No	No	Yes	No
group_5550	hypothetical protein	1	No	No	No	Yes	No
lipF_3	Carboxylesterase LipF	1	No	No	No	Yes	No
group_5554	hypothetical protein	1	No	No	No	Yes	No
group_5555	hypothetical protein	1	No	No	No	Yes	No
group_5556	hypothetical protein	1	No	No	No	Yes	No
group_5557	hypothetical protein	1	No	No	No	Yes	No
group_5558	hypothetical protein	1	No	No	No	Yes	No
group_5560	hypothetical protein	1	No	No	No	Yes	No
group_5561	hypothetical protein	1	No	No	No	Yes	No
group_5562	hypothetical protein	1	No	No	No	Yes	No
group_5563	hypothetical protein	1	No	No	No	Yes	No
group_5565	hypothetical protein	1	No	No	No	Yes	No
group_5568	hypothetical protein	1	No	No	No	Yes	No
group_5569	hypothetical protein	1	No	No	No	Yes	No
cobB_3	NAD-dependent protein deacetylase	1	No	No	No	Yes	No
group_5572	hypothetical protein	1	No	No	No	Yes	No
group_5573	hypothetical protein	1	No	No	No	Yes	No
group_5574	hypothetical protein	1	No	No	No	Yes	No
group_5577	hypothetical protein	1	No	No	No	Yes	No
group_5578	hypothetical protein	1	No	No	No	Yes	No
group_5579	hypothetical protein	1	No	No	No	Yes	No
group_5582	hypothetical protein	1	No	No	No	Yes	No
group_5583	hypothetical protein	1	No	No	No	Yes	No
group_5584	hypothetical protein	1	No	No	No	Yes	No
group_5585	hypothetical protein	1	No	No	No	Yes	No
group_5586	hypothetical protein	1	No	No	No	Yes	No
group_5587	hypothetical protein	1	No	No	No	Yes	No
group_5588	hypothetical protein	1	No	No	No	Yes	No
group_5589	hypothetical protein	1	No	No	No	Yes	No
group_5590	hypothetical protein	1	No	No	No	Yes	No
group_5591	hypothetical protein	1	No	No	No	Yes	No
group_5592	hypothetical protein	1	No	No	No	Yes	No
group_5593	hypothetical protein	1	No	No	No	Yes	No
group_5594	hypothetical protein	1	No	No	No	Yes	No
group_5596	hypothetical protein	1	No	No	No	Yes	No
group_5597	hypothetical protein	1	No	No	No	Yes	No
group_5598	hypothetical protein	1	No	No	No	Yes	No
group_5599	hypothetical protein	1	No	No	No	Yes	No
group_5600	hypothetical protein	1	No	No	No	Yes	No
group_5601	hypothetical protein	1	No	No	No	Yes	No
group_5602	hypothetical protein	1	No	No	No	Yes	No
group_5604	hypothetical protein	1	No	No	No	Yes	No
group_5605	hypothetical protein	1	No	No	No	Yes	No
group_5606	hypothetical protein	1	No	No	No	Yes	No
group_5611	hypothetical protein	1	No	No	No	Yes	No
group_5612	putative type I restriction enzymeP M protein	1	No	No	No	Yes	No
group_5613	hypothetical protein	1	No	No	No	Yes	No
group_5614	hypothetical protein	1	No	No	No	Yes	No
group_5616	hypothetical protein	1	No	No	No	Yes	No
group_5617	hypothetical protein	1	No	No	No	Yes	No
group_5618	hypothetical protein	1	No	No	No	Yes	No
group_5619	hypothetical protein	1	No	No	No	Yes	No
group_5620	hypothetical protein	1	No	No	No	Yes	No
group_5622	hypothetical protein	1	No	No	No	Yes	No
group_5623	hypothetical protein	1	No	No	No	Yes	No
group_5624	Putative prophage phiRv2 integrase	1	No	No	No	Yes	No
group_5625	hypothetical protein	1	No	No	No	Yes	No
group_5626	hypothetical protein	1	No	No	No	Yes	No
group_5627	hypothetical protein	1	No	No	No	Yes	No
group_5628	hypothetical protein	1	No	No	No	Yes	No
group_5629	hypothetical protein	1	No	No	No	Yes	No
group_5630	hypothetical protein	1	No	No	No	Yes	No
group_5631	hypothetical protein	1	No	No	No	Yes	No
group_5632	hypothetical protein	1	No	No	No	Yes	No
group_5633	Insertion element uncharacterized 12.0 kDa protein	1	No	No	No	Yes	No
group_5634	hypothetical protein	1	No	No	No	Yes	No
group_5635	putative HTH-type transcriptional regulator	1	No	No	No	Yes	No
group_5636	hypothetical protein	1	No	No	No	Yes	No
group_5639	hypothetical protein	1	No	No	No	Yes	No
group_5641	hypothetical protein	1	No	No	No	Yes	No
group_5642	hypothetical protein	1	No	No	No	Yes	No
group_5643	hypothetical protein	1	No	No	No	Yes	No
group_5645	hypothetical protein	1	No	No	No	Yes	No
group_5646	hypothetical protein	1	No	No	No	Yes	No
group_5648	hypothetical protein	1	No	No	No	Yes	No
group_5649	hypothetical protein	1	No	No	No	Yes	No
group_5650	hypothetical protein	1	No	No	No	Yes	No
group_5651	hypothetical protein	1	No	No	No	Yes	No
group_5652	hypothetical protein	1	No	No	No	Yes	No
group_5653	hypothetical protein	1	No	No	No	Yes	No
group_5654	hypothetical protein	1	No	No	No	Yes	No
group_5656	hypothetical protein	1	No	No	No	Yes	No
group_5658	hypothetical protein	1	No	No	No	Yes	No
group_5659	hypothetical protein	1	No	No	No	Yes	No
group_5660	hypothetical protein	1	No	No	No	Yes	No
group_5663	hypothetical protein	1	No	No	No	Yes	No
group_5665	hypothetical protein	1	No	No	No	Yes	No
group_5666	hypothetical protein	1	No	No	No	Yes	No
group_5667	hypothetical protein	1	No	No	No	Yes	No
group_5668	hypothetical protein	1	No	No	No	Yes	No
group_5669	hypothetical protein	1	No	No	No	Yes	No
group_5670	hypothetical protein	1	No	No	No	Yes	No
group_5672	hypothetical protein	1	No	No	No	Yes	No
group_5673	hypothetical protein	1	No	No	No	Yes	No
group_5674	hypothetical protein	1	No	No	No	Yes	No
group_5676	hypothetical protein	1	No	No	No	Yes	No
group_5677	hypothetical protein	1	No	No	No	Yes	No
group_5678	hypothetical protein	1	No	No	No	Yes	No
group_5679	hypothetical protein	1	No	No	No	Yes	No
group_5680	hypothetical protein	1	No	No	No	Yes	No
group_5683	Long-chain-fatty-acid--CoA ligase FadD13	1	No	No	No	Yes	No
group_5689	hypothetical protein	1	No	No	No	Yes	No
group_5690	hypothetical protein	1	No	No	No	Yes	No
group_5696	hypothetical protein	1	No	No	No	Yes	No
group_5697	hypothetical protein	1	No	No	No	Yes	No
group_5698	hypothetical protein	1	No	No	No	Yes	No
group_5699	hypothetical protein	1	No	No	No	Yes	No
group_5702	Acyltrehalose exporter MmpL10	1	No	No	No	Yes	No
group_5703	hypothetical protein	1	No	No	No	Yes	No
group_5704	hypothetical protein	1	No	No	No	Yes	No
caiD_4	Carnitinyl-CoA dehydratase	1	No	No	No	Yes	No
group_5706	hypothetical protein	1	No	No	No	Yes	No
group_5707	hypothetical protein	1	No	No	No	Yes	No
group_5708	hypothetical protein	1	No	No	No	Yes	No
group_5709	hypothetical protein	1	No	No	No	Yes	No
group_5710	Ribonuclease VapC35	1	No	No	No	Yes	No
group_5711	Antitoxin VapB35	1	No	No	No	Yes	No
group_5712	hypothetical protein	1	No	No	No	Yes	No
group_5723	hypothetical protein	1	No	No	No	Yes	No
group_5724	hypothetical protein	1	No	No	No	Yes	No
group_5729	hypothetical protein	1	No	No	No	Yes	No
group_5730	hypothetical protein	1	No	No	No	Yes	No
group_5731	hypothetical protein	1	No	No	No	Yes	No
group_5732	hypothetical protein	1	No	No	No	Yes	No
group_5733	hypothetical protein	1	No	No	No	Yes	No
group_5734	hypothetical protein	1	No	No	No	Yes	No
group_5735	hypothetical protein	1	No	No	No	Yes	No
group_5738	hypothetical protein	1	No	No	No	Yes	No
group_5739	hypothetical protein	1	No	No	No	Yes	No
group_5741	Iron-sulfur cluster carrier protein	1	No	No	No	Yes	No
group_5742	hypothetical protein	1	No	No	No	Yes	No
group_5743	hypothetical protein	1	No	No	No	Yes	No
group_5744	hypothetical protein	1	No	No	No	Yes	No
higA2	Putative antitoxin HigA2	1	No	No	No	Yes	No
higB2	Putative toxin HigB2	1	No	No	No	Yes	No
group_5748	hypothetical protein	1	No	No	No	Yes	No
group_5749	hypothetical protein	1	No	No	No	Yes	No
group_5750	hypothetical protein	1	No	No	No	Yes	No
group_5751	hypothetical protein	1	No	No	No	Yes	No
group_5752	hypothetical protein	1	No	No	No	Yes	No
group_5753	hypothetical protein	1	No	No	No	Yes	No
group_5760	hypothetical protein	1	No	No	No	Yes	No
group_5761	hypothetical protein	1	No	No	No	Yes	No
group_5762	hypothetical protein	1	No	No	No	Yes	No
group_5763	hypothetical protein	1	No	No	No	Yes	No
group_5767	hypothetical protein	1	No	No	No	Yes	No
group_5768	hypothetical protein	1	No	No	No	Yes	No
group_5769	hypothetical protein	1	No	No	No	Yes	No
group_5775	hypothetical protein	1	No	No	No	Yes	No
group_5776	hypothetical protein	1	No	No	No	Yes	No
group_5777	hypothetical protein	1	No	No	No	Yes	No
group_5778	hypothetical protein	1	No	No	No	Yes	No
group_5779	hypothetical protein	1	No	No	No	Yes	No
xerD_4	Tyrosine recombinase XerD	1	No	No	No	Yes	No
group_5786	hypothetical protein	1	No	No	No	Yes	No
fadR_4	Fatty acid metabolism regulator protein	1	No	No	No	Yes	No
group_5796	hypothetical protein	1	No	No	No	Yes	No
group_5797	hypothetical protein	1	No	No	No	Yes	No
mshD_3	Mycothiol acetyltransferase	1	No	No	No	Yes	No
group_5813	hypothetical protein	1	No	No	No	Yes	No
mmpS5_4	Siderophore export accessory protein MmpS5	1	No	No	No	Yes	No
ftsH_2	ATP-dependent zinc metalloprotease FtsH	1	No	No	No	Yes	No
group_5828	hypothetical protein	1	No	No	No	Yes	No
group_5829	hypothetical protein	1	No	No	No	Yes	No
group_5831	hypothetical protein	1	No	No	No	Yes	No
group_5832	hypothetical protein	1	No	No	No	Yes	No
group_5833	hypothetical protein	1	No	No	No	Yes	No
group_5834	Insertion element uncharacterized 12.0 kDa protein	1	No	No	No	Yes	No
group_5841	hypothetical protein	1	No	No	No	Yes	No
hdl IVa	(S)-2-haloacid dehalogenase 4A	1	No	No	No	No	Yes
group_5851	hypothetical protein	1	No	No	No	Yes	No
group_5853	hypothetical protein	1	No	No	No	Yes	No
group_5857	hypothetical protein	1	No	No	No	Yes	No
group_5864	hypothetical protein	1	No	No	No	Yes	No
group_5866	hypothetical protein	1	No	No	No	Yes	No
group_5867	hypothetical protein	1	No	No	No	Yes	No
group_5868	hypothetical protein	1	No	No	No	Yes	No
group_5873	hypothetical protein	1	No	No	No	Yes	No
group_5899	hypothetical protein	1	No	No	No	Yes	No
group_5900	hypothetical protein	1	No	No	No	Yes	No
group_5945	hypothetical protein	1	No	No	No	Yes	No
group_5946	hypothetical protein	1	No	No	No	Yes	No
group_5947	hypothetical protein	1	No	No	No	Yes	No
group_5948	hypothetical protein	1	No	No	No	Yes	No
group_5959	hypothetical protein	1	No	No	No	Yes	No
group_5974	hypothetical protein	1	No	No	No	Yes	No
group_5975	hypothetical protein	1	No	No	No	Yes	No
group_6122	hypothetical protein	1	No	No	No	Yes	No
group_6123	hypothetical protein	1	No	No	No	Yes	No
group_6124	hypothetical protein	1	No	No	No	Yes	No
group_6129	hypothetical protein	1	No	No	No	Yes	No
group_6130	hypothetical protein	1	No	No	No	Yes	No
group_617	hypothetical protein	1	No	No	No	Yes	No
group_62	hypothetical protein	1	No	No	No	Yes	No
pknF_2	Serine/threonine-protein kinase PknF	1	No	Yes	No	No	No
mhpA_4	3-(3-hydroxy-phenyl)propionate/3-hydroxycinnamic acid hydroxylase	1	No	No	Yes	No	No
hspR_3	Putative heat shock protein HspR	1	No	No	No	Yes	No
group_6419	hypothetical protein	1	No	No	No	No	Yes
group_6420	hypothetical protein	1	No	No	No	No	Yes
group_6421	hypothetical protein	1	No	No	No	No	Yes
ksgA_2	Ribosomal RNA small subunit methyltransferase A	1	No	No	No	No	Yes
group_6427	hypothetical protein	1	No	No	No	No	Yes
group_6428	hypothetical protein	1	No	No	No	No	Yes
group_6429	Elongation factor G-like protein	1	No	No	No	No	Yes
group_6430	hypothetical protein	1	No	No	No	No	Yes
mak	Maltokinase	1	No	No	No	No	Yes
group_6433	hypothetical protein	1	No	No	No	No	Yes
mmpL4_4	Siderophore exporter MmpL4	1	No	No	No	No	Yes
mmpS5_2	Siderophore export accessory protein MmpS5	1	No	No	No	No	Yes
ricR_1	Copper-sensing transcriptional repressor RicR	1	No	No	No	No	Yes
group_6437	Thioredoxin-like reductase	1	No	No	No	No	Yes
group_6438	hypothetical protein	1	No	No	No	No	Yes
group_6439	hypothetical protein	1	No	No	No	No	Yes
group_6440	hypothetical protein	1	No	No	No	No	Yes
group_6441	putative enoyl-CoA hydratase 1	1	No	No	No	No	Yes
group_6442	hypothetical protein	1	No	No	No	No	Yes
group_6444	hypothetical protein	1	No	No	No	No	Yes
group_6445	hypothetical protein	1	No	No	No	No	Yes
hsdM	Type I restriction enzyme EcoKI M protein	1	No	No	No	No	Yes
group_6447	hypothetical protein	1	No	No	No	No	Yes
group_6448	hypothetical protein	1	No	No	No	No	Yes
group_6449	hypothetical protein	1	No	No	No	No	Yes
group_6451	hypothetical protein	1	No	No	No	No	Yes
group_6452	hypothetical protein	1	No	No	No	No	Yes
group_6453	hypothetical protein	1	No	No	No	No	Yes
group_6454	hypothetical protein	1	No	No	No	No	Yes
group_6455	hypothetical protein	1	No	No	No	No	Yes
group_6458	Insertion sequence putative ATP-binding protein	1	No	No	No	No	Yes
group_6459	hypothetical protein	1	No	No	No	No	Yes
group_6460	Insertion sequence putative ATP-binding protein	1	No	No	No	No	Yes
group_6461	hypothetical protein	1	No	No	No	No	Yes
group_6462	hypothetical protein	1	No	No	No	No	Yes
group_6463	Insertion sequence putative ATP-binding protein	1	No	No	No	No	Yes
group_6464	hypothetical protein	1	No	No	No	No	Yes
trmB	tRNA (guanine-N(7)-)-methyltransferase	1	No	No	No	No	Yes
group_6467	hypothetical protein	1	No	No	No	No	Yes
group_6468	hypothetical protein	1	No	No	No	No	Yes
group_6469	hypothetical protein	1	No	No	No	No	Yes
group_6470	hypothetical protein	1	No	No	No	No	Yes
group_6471	hypothetical protein	1	No	No	No	No	Yes
group_6472	Ureidoglycolate lyase	1	No	No	No	No	Yes
mhpA_2	3-(3-hydroxy-phenyl)propionate/3-hydroxycinnamic acid hydroxylase	1	No	No	No	No	Yes
group_6477	hypothetical protein	1	No	No	No	No	Yes
group_6479	Immunogenic protein MPT64	1	No	No	No	No	Yes
group_6480	hypothetical protein	1	No	No	No	No	Yes
group_6481	hypothetical protein	1	No	No	No	No	Yes
hmrR	HTH-type transcriptional regulator HmrR	1	No	No	No	No	Yes
group_6485	hypothetical protein	1	No	No	No	No	Yes
eryA_2	Erythronolide synthase; modules 5 and 6	1	No	No	No	No	Yes
group_6488	Putative inactive phenolphthiocerol synthesis polyketide synthase type I Pks15	1	No	No	No	No	Yes
mbtB_1	Phenyloxazoline synthase MbtB	1	No	No	No	No	Yes
iucB	N(6)-hydroxylysine O-acetyltransferase	1	No	No	No	No	Yes
dhbF_1	Dimodular nonribosomal peptide synthase	1	No	No	No	No	Yes
srfAB	Surfactin synthase subunit 2	1	No	No	No	No	Yes
mbtB_2	Phenyloxazoline synthase MbtB	1	No	No	No	No	Yes
group_6494	hypothetical protein	1	No	No	No	No	Yes
esxN_1	ESAT-6-like protein EsxN	1	No	No	No	No	Yes
group_6496	Putative ESAT-6-like protein 7	1	No	No	No	No	Yes
group_6497	putative PPE family protein PPE32	1	No	No	No	No	Yes
group_6498	putative PE-PGRS family protein PE_PGRS24	1	No	No	No	No	Yes
sbnA_1	putative siderophore biosynthesis protein SbnA	1	No	No	No	No	Yes
sbnA_3	putative siderophore biosynthesis protein SbnA	1	No	No	No	No	Yes
lgrD_1	Linear gramicidin synthase subunit D	1	No	No	No	No	Yes
group_6505	hypothetical protein	1	No	No	No	No	Yes
group_6506	hypothetical protein	1	No	No	No	No	Yes
group_6508	hypothetical protein	1	No	No	No	No	Yes
group_6509	Insertion element uncharacterized 12.0 kDa protein	1	No	No	No	No	Yes
group_6510	putative PPE family protein PPE32	1	No	No	No	No	Yes
group_6511	hypothetical protein	1	No	No	No	No	Yes
ricR_2	Copper-sensing transcriptional repressor RicR	1	No	No	No	No	Yes
ctpV	putative copper-exporting P-type ATPase V	1	No	No	No	No	Yes
group_6514	hypothetical protein	1	No	No	No	No	Yes
group_6516	hypothetical protein	1	No	No	No	No	Yes
mmcO_2	Multicopper oxidase MmcO	1	No	No	No	No	Yes
ricR_3	Copper-sensing transcriptional repressor RicR	1	No	No	No	No	Yes
rslA_2	Anti-sigma-L factor RslA	1	No	No	No	No	Yes
group_6521	Delta(1)-pyrroline-2-carboxylate reductase	1	No	No	No	No	Yes
group_6524	putative PPE family protein PPE32	1	No	No	No	No	Yes
ppe3_3	putative PPE family protein PPE3	1	No	No	No	No	Yes
acr3	Arsenical-resistance protein Acr3	1	No	No	No	No	Yes
cadI	Cadmium-induced protein CadI	1	No	No	No	No	Yes
group_6531	hypothetical protein	1	No	No	No	No	Yes
group_6532	hypothetical protein	1	No	No	No	No	Yes
group_6533	hypothetical protein	1	No	No	No	No	Yes
group_6534	hypothetical protein	1	No	No	No	No	Yes
group_6535	hypothetical protein	1	No	No	No	No	Yes
group_6536	hypothetical protein	1	No	No	No	No	Yes
pntAA	NAD(P) transhydrogenase subunit alpha part 1	1	No	No	No	No	Yes
group_6538	hypothetical protein	1	No	No	No	No	Yes
bbsG_5	(R)-benzylsuccinyl-CoA dehydrogenase	1	No	No	No	No	Yes
group_6541	Putative short-chain type dehydrogenase/reductase	1	No	No	No	No	Yes
calB	Coniferyl aldehyde dehydrogenase	1	No	No	No	No	Yes
group_6543	Putative S-adenosyl-L-methionine-dependent methyltransferase	1	No	No	No	No	Yes
group_6544	Putative S-adenosyl-L-methionine-dependent methyltransferase	1	No	No	No	No	Yes
group_6545	hypothetical protein	1	No	No	No	No	Yes
group_6546	Putative quercetin 2;3-dioxygenase	1	No	No	No	No	Yes
dps	DNA protection during starvation protein	1	No	No	No	No	Yes
group_6549	hypothetical protein	1	No	No	No	No	Yes
group_6550	hypothetical protein	1	No	No	No	No	Yes
group_6551	hypothetical protein	1	No	No	No	No	Yes
group_6552	hypothetical protein	1	No	No	No	No	Yes
group_6554	hypothetical protein	1	No	No	No	No	Yes
group_6555	Putative cytochrome P450 138	1	No	No	No	No	Yes
group_6556	hypothetical protein	1	No	No	No	No	Yes
mopII	Molybdenum-pterin-binding protein 2	1	No	No	No	No	Yes
group_6560	hypothetical protein	1	No	No	No	No	Yes
group_6561	putative HTH-type transcriptional regulator	1	No	No	No	No	Yes
group_6562	hypothetical protein	1	No	No	No	No	Yes
group_6563	Putative coenzyme F420-dependent oxidoreductase	1	No	No	No	No	Yes
group_6564	hypothetical protein	1	No	No	No	No	Yes
desA3_2	NADPH-dependent stearoyl-CoA 9-desaturase	1	No	No	No	No	Yes
group_6566	NADPH oxidoreductase	1	No	No	No	No	Yes
fabR_2	HTH-type transcriptional repressor FabR	1	No	No	No	No	Yes
group_6568	hypothetical protein	1	No	No	No	No	Yes
group_6569	hypothetical protein	1	No	No	No	No	Yes
fgd2_5	F420-dependent hydroxymycolic acid dehydrogenase	1	No	No	No	No	Yes
group_6572	hypothetical protein	1	No	No	No	No	Yes
group_6573	hypothetical protein	1	No	No	No	No	Yes
group_6580	hypothetical protein	1	No	No	No	No	Yes
group_6581	hypothetical protein	1	No	No	No	No	Yes
group_6582	hypothetical protein	1	No	No	No	No	Yes
group_6583	hypothetical protein	1	No	No	No	No	Yes
group_6584	hypothetical protein	1	No	No	No	No	Yes
group_6586	hypothetical protein	1	No	No	No	No	Yes
group_6587	hypothetical protein	1	No	No	No	No	Yes
group_6589	hypothetical protein	1	No	No	No	No	Yes
group_6590	hypothetical protein	1	No	No	No	No	Yes
group_6591	Antitoxin	1	No	No	No	No	Yes
group_6592	hypothetical protein	1	No	No	No	No	Yes
group_6594	hypothetical protein	1	No	No	No	No	Yes
group_6595	hypothetical protein	1	No	No	No	No	Yes
group_6596	hypothetical protein	1	No	No	No	No	Yes
group_6597	hypothetical protein	1	No	No	No	No	Yes
group_6598	hypothetical protein	1	No	No	No	No	Yes
group_6599	hypothetical protein	1	No	No	No	No	Yes
fadB_2	putative enoyl-CoA hydratase	1	No	No	No	No	Yes
group_6602	hypothetical protein	1	No	No	No	No	Yes
group_6603	hypothetical protein	1	No	No	No	No	Yes
group_6604	hypothetical protein	1	No	No	No	No	Yes
group_6605	hypothetical protein	1	No	No	No	No	Yes
group_6606	hypothetical protein	1	No	No	No	No	Yes
group_6607	hypothetical protein	1	No	No	No	No	Yes
group_6608	hypothetical protein	1	No	No	No	No	Yes
group_6609	hypothetical protein	1	No	No	No	No	Yes
group_6610	hypothetical protein	1	No	No	No	No	Yes
group_6611	hypothetical protein	1	No	No	No	No	Yes
elmMIII_2	8-demethyl-8-(2;3-dimethoxy-alpha-L-rhamnosyl)-tetracenomycin-C 4'-O-methyltransferase	1	No	No	No	No	Yes
group_6613	putative glycosyltransferase	1	No	No	No	No	Yes
group_6614	hypothetical protein	1	No	No	No	No	Yes
group_6619	Putative diacyglycerol O-acyltransferase	1	No	No	No	No	Yes
group_6620	Putative cytochrome P450 123	1	No	No	No	No	Yes
group_6621	Phthiodiolone/phenolphthiodiolone dimycocerosates ketoreductase	1	No	No	No	No	Yes
group_6623	hypothetical protein	1	No	No	No	No	Yes
group_6624	Putative cytochrome P450 137	1	No	No	No	No	Yes
rebM_5	Demethylrebeccamycin-D-glucose O-methyltransferase	1	No	No	No	No	Yes
bioI	Biotin biosynthesis cytochrome P450	1	No	No	No	No	Yes
fabG_14	3-oxoacyl-[acyl-carrier-protein] reductase FabG	1	No	No	No	No	Yes
mlaE_9	putative phospholipid ABC transporter permease protein MlaE	1	No	No	No	No	Yes
group_6630	hypothetical protein	1	No	No	No	No	Yes
group_6631	hypothetical protein	1	No	No	No	No	Yes
group_6632	hypothetical protein	1	No	No	No	No	Yes
group_6633	hypothetical protein	1	No	No	No	No	Yes
group_6634	hypothetical protein	1	No	No	No	No	Yes
group_6636	hypothetical protein	1	No	No	No	No	Yes
group_6637	hypothetical protein	1	No	No	No	No	Yes
group_6638	hypothetical protein	1	No	No	No	No	Yes
group_6639	hypothetical protein	1	No	No	No	No	Yes
eccA5_1	ESX-5 secretion system protein EccA5	1	No	No	No	No	Yes
eccE5_1	ESX-5 secretion system protein EccE5	1	No	No	No	No	Yes
group_6642	Thermophilic serine proteinase	1	No	No	No	No	Yes
eccD5_1	ESX-5 secretion system protein EccD5	1	No	No	No	No	Yes
espI_4	ESX-1 secretion-associated protein EspI	1	No	No	No	No	Yes
group_6645	putative PPE family protein PPE51	1	No	No	No	No	Yes
group_6648	putative endopeptidase	1	No	No	No	No	Yes
group_6649	hypothetical protein	1	No	No	No	No	Yes
group_6650	hypothetical protein	1	No	No	No	No	Yes
group_6651	hypothetical protein	1	No	No	No	No	Yes
group_6652	hypothetical protein	1	No	No	No	No	Yes
group_6653	hypothetical protein	1	No	No	No	No	Yes
group_6654	hypothetical protein	1	No	No	No	No	Yes
group_6655	hypothetical protein	1	No	No	No	No	Yes
group_6657	hypothetical protein	1	No	No	No	No	Yes
group_6658	hypothetical protein	1	No	No	No	No	Yes
group_6659	hypothetical protein	1	No	No	No	No	Yes
group_666	hypothetical protein	1	No	No	No	No	Yes
hin_1	DNA-invertase hin	1	No	No	No	No	Yes
kstR_2	HTH-type transcriptional repressor KstR	1	No	No	No	No	Yes
group_6662	hypothetical protein	1	No	No	No	No	Yes
kstR_3	HTH-type transcriptional repressor KstR	1	No	No	No	No	Yes
group_6664	hypothetical protein	1	No	No	No	No	Yes
group_6665	Acyltrehalose exporter MmpL10	1	No	No	No	No	Yes
hin_2	DNA-invertase hin	1	No	No	No	No	Yes
group_6667	hypothetical protein	1	No	No	No	No	Yes
traI_1	Multifunctional conjugation protein TraI	1	No	No	No	No	Yes
group_6669	hypothetical protein	1	No	No	No	No	Yes
group_6670	hypothetical protein	1	No	No	No	No	Yes
group_6671	hypothetical protein	1	No	No	No	No	Yes
group_6672	hypothetical protein	1	No	No	No	No	Yes
group_6673	hypothetical protein	1	No	No	No	No	Yes
group_6674	hypothetical protein	1	No	No	No	No	Yes
group_6675	hypothetical protein	1	No	No	No	No	Yes
group_6676	hypothetical protein	1	No	No	No	No	Yes
group_6677	hypothetical protein	1	No	No	No	No	Yes
whiB	Transcriptional regulator WhiB	1	No	No	No	No	Yes
group_6679	hypothetical protein	1	No	No	No	No	Yes
group_6680	hypothetical protein	1	No	No	No	No	Yes
group_6681	hypothetical protein	1	No	No	No	No	Yes
group_6682	hypothetical protein	1	No	No	No	No	Yes
soj_4	Sporulation initiation inhibitor protein Soj	1	No	No	No	No	Yes
group_6684	hypothetical protein	1	No	No	No	No	Yes
group_6686	hypothetical protein	1	No	No	No	No	Yes
fitB_1	Toxin FitB	1	No	No	No	No	Yes
group_6688	hypothetical protein	1	No	No	No	No	Yes
group_6689	hypothetical protein	1	No	No	No	No	Yes
group_6690	hypothetical protein	1	No	No	No	No	Yes
group_6691	hypothetical protein	1	No	No	No	No	Yes
group_6692	hypothetical protein	1	No	No	No	No	Yes
group_6693	hypothetical protein	1	No	No	No	No	Yes
group_6694	hypothetical protein	1	No	No	No	No	Yes
group_6695	hypothetical protein	1	No	No	No	No	Yes
group_6696	hypothetical protein	1	No	No	No	No	Yes
group_6697	hypothetical protein	1	No	No	No	No	Yes
group_6698	hypothetical protein	1	No	No	No	No	Yes
group_6699	hypothetical protein	1	No	No	No	No	Yes
group_6700	hypothetical protein	1	No	No	No	No	Yes
group_6701	hypothetical protein	1	No	No	No	No	Yes
group_6702	2-haloalkanoic acid dehalogenase	1	No	No	No	No	Yes
group_6703	hypothetical protein	1	No	No	No	No	Yes
catD	Putative oxidoreductase CatD	1	No	No	No	No	Yes
group_671	hypothetical protein	1	No	No	No	Yes	No
group_6710	hypothetical protein	1	No	No	No	No	Yes
rpoE	ECF RNA polymerase sigma-E factor	1	No	No	No	No	Yes
group_6712	hypothetical protein	1	No	No	No	No	Yes
mftE_2	Putative mycofactocin system creatinine amidohydrolase family protein MftE	1	No	No	No	No	Yes
group_6715	hypothetical protein	1	No	No	No	No	Yes
group_6716	hypothetical protein	1	No	No	No	No	Yes
ftsK_2	DNA translocase FtsK	1	No	No	No	No	Yes
group_6718	hypothetical protein	1	No	No	No	No	Yes
group_6719	hypothetical protein	1	No	No	No	No	Yes
group_6720	hypothetical protein	1	No	No	No	No	Yes
group_6721	hypothetical protein	1	No	No	No	No	Yes
group_6722	hypothetical protein	1	No	No	No	No	Yes
group_6723	hypothetical protein	1	No	No	No	No	Yes
nrdH_2	Glutaredoxin-like protein NrdH	1	No	No	No	No	Yes
group_6725	hypothetical protein	1	No	No	No	No	Yes
group_6726	hypothetical protein	1	No	No	No	No	Yes
group_6727	Serine protease 2	1	No	No	No	No	Yes
group_6728	hypothetical protein	1	No	No	No	No	Yes
group_6729	hypothetical protein	1	No	No	No	No	Yes
group_6730	hypothetical protein	1	No	No	No	No	Yes
group_6731	hypothetical protein	1	No	No	No	No	Yes
group_6732	hypothetical protein	1	No	No	No	No	Yes
group_6733	hypothetical protein	1	No	No	No	No	Yes
group_6734	hypothetical protein	1	No	No	No	No	Yes
group_6735	hypothetical protein	1	No	No	No	No	Yes
group_6736	hypothetical protein	1	No	No	No	No	Yes
group_6737	hypothetical protein	1	No	No	No	No	Yes
group_6739	hypothetical protein	1	No	No	No	No	Yes
ctpE	putative cation-transporting ATPase E	1	No	No	No	No	Yes
group_6740	hypothetical protein	1	No	No	No	No	Yes
ndhC	NAD(P)H-quinone oxidoreductase subunit 3	1	No	No	No	No	Yes
group_6743	hypothetical protein	1	No	No	No	No	Yes
group_6745	hypothetical protein	1	No	No	No	No	Yes
nuoK	NADH-quinone oxidoreductase subunit K	1	No	No	No	No	Yes
group_6751	hypothetical protein	1	No	No	No	No	Yes
group_6752	hypothetical protein	1	No	No	No	No	Yes
group_6753	hypothetical protein	1	No	No	No	No	Yes
group_6754	hypothetical protein	1	No	No	No	No	Yes
group_6755	hypothetical protein	1	No	No	No	No	Yes
group_6756	hypothetical protein	1	No	No	No	No	Yes
group_6757	hypothetical protein	1	No	No	No	No	Yes
group_6758	hypothetical protein	1	No	No	No	No	Yes
group_6759	hypothetical protein	1	No	No	No	No	Yes
group_6760	hypothetical protein	1	No	No	No	No	Yes
group_6761	hypothetical protein	1	No	No	No	No	Yes
group_6762	hypothetical protein	1	No	No	No	No	Yes
clsA	Cardiolipin synthase A	1	No	No	No	No	Yes
group_6764	hypothetical protein	1	No	No	No	No	Yes
group_6765	hypothetical protein	1	No	No	No	No	Yes
group_6766	hypothetical protein	1	No	No	No	No	Yes
group_6767	hypothetical protein	1	No	No	No	No	Yes
group_6768	hypothetical protein	1	No	No	No	No	Yes
group_6769	hypothetical protein	1	No	No	No	No	Yes
group_6770	hypothetical protein	1	No	No	No	No	Yes
group_6771	hypothetical protein	1	No	No	No	No	Yes
group_6772	hypothetical protein	1	No	No	No	No	Yes
group_6773	hypothetical protein	1	No	No	No	No	Yes
group_6774	hypothetical protein	1	No	No	No	No	Yes
group_6775	hypothetical protein	1	No	No	No	No	Yes
group_6776	hypothetical protein	1	No	No	No	No	Yes
group_6777	hypothetical protein	1	No	No	No	No	Yes
group_6778	hypothetical protein	1	No	No	No	No	Yes
group_6779	hypothetical protein	1	No	No	No	No	Yes
group_6785	hypothetical protein	1	No	No	No	No	Yes
group_6786	hypothetical protein	1	No	No	No	No	Yes
group_6787	hypothetical protein	1	No	No	No	No	Yes
group_6788	hypothetical protein	1	No	No	No	No	Yes
group_6789	hypothetical protein	1	No	No	No	No	Yes
group_6790	hypothetical protein	1	No	No	No	No	Yes
group_6791	hypothetical protein	1	No	No	No	No	Yes
group_6792	Putative prophage phiRv2 integrase	1	No	No	No	No	Yes
group_6793	hypothetical protein	1	No	No	No	No	Yes
group_6794	hypothetical protein	1	No	No	No	No	Yes
group_6795	hypothetical protein	1	No	No	No	No	Yes
group_6796	hypothetical protein	1	No	No	No	No	Yes
group_6797	hypothetical protein	1	No	No	No	No	Yes
group_6798	hypothetical protein	1	No	No	No	No	Yes
group_6799	hypothetical protein	1	No	No	No	No	Yes
group_6800	hypothetical protein	1	No	No	No	No	Yes
group_6801	hypothetical protein	1	No	No	No	No	Yes
group_6802	hypothetical protein	1	No	No	No	No	Yes
group_6806	hypothetical protein	1	No	No	No	No	Yes
group_6807	hypothetical protein	1	No	No	No	No	Yes
group_6810	hypothetical protein	1	No	No	No	No	Yes
group_6811	hypothetical protein	1	No	No	No	No	Yes
group_6812	Insertion sequence putative ATP-binding protein	1	No	No	No	No	Yes
group_6813	hypothetical protein	1	No	No	No	No	Yes
group_6814	hypothetical protein	1	No	No	No	No	Yes
group_6815	hypothetical protein	1	No	No	No	No	Yes
group_6816	hypothetical protein	1	No	No	No	No	Yes
group_6817	hypothetical protein	1	No	No	No	No	Yes
group_6818	hypothetical protein	1	No	No	No	No	Yes
group_6819	hypothetical protein	1	No	No	No	No	Yes
group_6820	hypothetical protein	1	No	No	No	No	Yes
group_689	putative HTH-type transcriptional regulator	1	No	No	No	Yes	No
desA3_4	NADPH-dependent stearoyl-CoA 9-desaturase	1	No	No	No	Yes	No
group_765	hypothetical protein	1	No	No	No	Yes	No
group_773	putative oxidoreductase	1	No	No	No	Yes	No
group_7836	hypothetical protein	1	No	No	No	Yes	No
group_7878	hypothetical protein	1	No	No	No	Yes	No
acnR_4	HTH-type transcriptional repressor AcnR	1	No	No	No	Yes	No
group_7988	hypothetical protein	1	No	No	No	Yes	No
rcdA_2	HTH-type transcriptional regulator RcdA	1	No	No	No	Yes	No
fgd1_3	F420-dependent glucose-6-phosphate dehydrogenase	1	No	No	No	Yes	No
katA_2	Catalase	1	No	No	No	Yes	No
group_88	hypothetical protein	1	No	No	No	Yes	No
group_89	hypothetical protein	1	No	No	No	Yes	No
rkpK_2	UDP-glucose 6-dehydrogenase	1	No	No	No	Yes	No
group_918	hypothetical protein	1	No	No	No	Yes	No
group_9210	hypothetical protein	1	No	No	No	Yes	No
group_9226	hypothetical protein	1	No	No	No	Yes	No
group_9246	hypothetical protein	1	No	No	No	Yes	No
bphC_2	Biphenyl-2;3-diol 1;2-dioxygenase	1	No	No	No	Yes	No
plsC_4	1-acyl-sn-glycerol-3-phosphate acyltransferase	1	No	No	No	Yes	No
murD_2	UDP-N-acetylmuramoylalanine--D-glutamate ligase	1	No	No	No	Yes	No
group_978	hypothetical protein	1	No	No	No	No	Yes
acoA_2	Acetoin:2;6-dichlorophenolindophenol oxidoreductase subunit alpha	1	No	No	No	Yes	No
hmrR	HTH-type transcriptional regulator HmrR	1	No	No	No	Yes	No
hsrA_1	putative transport protein HsrA	1	No	No	No	No	Yes
htrB	Serine protease Do-like HtrB	1	No	No	No	No	Yes
iphP	Tyrosine-protein phosphatase	1	No	No	No	No	Yes
iucB	N(6)-hydroxylysine O-acetyltransferase	1	No	No	No	Yes	No
kstR2_9	HTH-type transcriptional repressor KstR2	1	No	No	No	Yes	No
lppC_1	Putative lipoprotein LppC	1	No	No	No	Yes	No
lppE_2	putative lipoprotein LppE	1	No	No	No	No	Yes
lpqS_1	Lipoprotein LpqS	1	No	No	No	Yes	No
lpqS_2	Lipoprotein LpqS	1	No	No	No	Yes	No
ltrA_1	Group II intron-encoded protein LtrA	1	No	No	No	Yes	No
ltrA_2	Group II intron-encoded protein LtrA	1	No	No	No	Yes	No
lysA_3	Diaminopimelate decarboxylase	1	No	No	No	No	Yes
mak_1	Maltokinase	1	No	No	No	Yes	No
mdtH	Multidrug resistance protein MdtH	1	No	No	No	No	Yes
mdtH_1	Multidrug resistance protein MdtH	1	No	No	No	Yes	No
mdtH_2	Multidrug resistance protein MdtH	1	No	No	No	Yes	No
mdtK	Multidrug resistance protein MdtK	1	No	No	No	Yes	No
menI_1	1;4-dihydroxy-2-naphthoyl-CoA hydrolase	1	No	No	No	Yes	No
mhpC_1	2-hydroxy-6-oxononadienedioate/2-hydroxy-6-oxononatrienedioate hydrolase	1	No	No	No	No	Yes
mlaE_10	putative phospholipid ABC transporter permease protein MlaE	1	No	No	No	No	Yes
mlaE_19	putative phospholipid ABC transporter permease protein MlaE	1	No	No	No	Yes	No
mlaE_20	putative phospholipid ABC transporter permease protein MlaE	1	No	No	No	Yes	No
mlhB_1	Monoterpene epsilon-lactone hydrolase	1	No	No	No	Yes	No
mlhB_2	Monoterpene epsilon-lactone hydrolase	1	No	No	No	Yes	No
mmgC_16	Acyl-CoA dehydrogenase	1	No	No	No	Yes	No
mmpL8_1	Sulfolipid-1 exporter MmpL8	1	No	No	No	Yes	No
mmpL8_2	Sulfolipid-1 exporter MmpL8	1	No	No	No	Yes	No
mtrR_3	HTH-type transcriptional regulator MtrR	1	No	No	No	Yes	No
mtrR_4	HTH-type transcriptional regulator MtrR	1	No	No	No	Yes	No
mutT4_3	Putative mutator protein MutT4	1	No	No	No	Yes	No
napA	Na( )/H( ) antiporter	1	No	No	No	Yes	No
ndhC	NAD(P)H-quinone oxidoreductase subunit 3	1	No	No	No	Yes	No
ndhD1	NAD(P)H-quinone oxidoreductase chain 4 1	1	No	No	No	No	Yes
nei1_3	Endonuclease 8 1	1	No	No	No	Yes	No
nemR	HTH-type transcriptional repressor NemR	1	No	No	No	Yes	No
nit	Nitrilase	1	No	No	No	Yes	No
norM	Multidrug resistance protein NorM	1	No	No	No	No	Yes
nrnA_1	Bifunctional oligoribonuclease and PAP phosphatase NrnA	1	No	No	No	Yes	No
nuoH_1	NADH-quinone oxidoreductase subunit H	1	No	No	No	Yes	No
nuoH_2	NADH-quinone oxidoreductase subunit H	1	No	No	No	No	Yes
nuoK	NADH-quinone oxidoreductase subunit K	1	No	No	No	Yes	No
nuoL_2	NADH-quinone oxidoreductase subunit L	1	No	No	No	No	Yes
nuoM_1	NADH-quinone oxidoreductase subunit M	1	No	No	No	Yes	No
nuoN_1	NADH-quinone oxidoreductase subunit N	1	No	No	No	Yes	No
nuoN_2	NADH-quinone oxidoreductase subunit N	1	No	No	No	No	Yes
otsB_1	Trehalose-phosphate phosphatase	1	No	No	No	Yes	No
parA	Chromosome partitioning protein ParA	1	No	No	No	No	Yes
parB_2	Chromosome-partitioning protein ParB	1	No	No	No	No	Yes
pht2	Phthalate 4;5-dioxygenase oxygenase reductase subunit	1	No	No	No	No	Yes
pknJ_2	Serine/threonine-protein kinase PknJ	1	No	No	Yes	No	No
pnbA_3	Para-nitrobenzyl esterase	1	No	No	No	Yes	No
ppsE	Plipastatin synthase subunit E	1	No	No	No	No	Yes
queC	7-cyano-7-deazaguanine synthase	1	No	No	No	Yes	No
rclC	Inner membrane protein RclC	1	No	No	No	No	Yes
rclC_1	Inner membrane protein RclC	1	No	No	No	Yes	No
recD2	ATP-dependent RecD-like DNA helicase	1	No	No	No	Yes	No
relF_1	Antitoxin RelF	1	No	No	No	Yes	No
rffG	dTDP-glucose 4;6-dehydratase 2	1	No	No	No	No	Yes
rpoE_2	ECF RNA polymerase sigma-E factor	1	No	No	No	Yes	No
rpoE_3	ECF RNA polymerase sigma-E factor	1	No	No	No	Yes	No
rsbQ	Sigma factor SigB regulation protein RsbQ	1	No	No	No	No	Yes
rslA_1	Anti-sigma-L factor RslA	1	No	No	No	Yes	No
ruvC_1	Crossover junction endodeoxyribonuclease RuvC	1	No	No	Yes	No	No
sadH_5	Putative oxidoreductase SadH	1	No	No	No	Yes	No
sbnA_1	putative siderophore biosynthesis protein SbnA	1	No	No	No	Yes	No
sbnA_2	putative siderophore biosynthesis protein SbnA	1	No	No	No	No	Yes
sbnA_3	putative siderophore biosynthesis protein SbnA	1	No	No	No	Yes	No
sftA	DNA translocase SftA	1	No	No	No	Yes	No
sigA_2	RNA polymerase sigma factor SigA	1	No	No	No	Yes	No
smtB_8	Succinyl-CoA--L-malate CoA-transferase beta subunit	1	No	No	No	No	Yes
spo0C	Chromosome-partitioning protein Spo0J	1	No	No	No	Yes	No
srfAB	Surfactin synthase subunit 2	1	No	No	No	Yes	No
srrA	Transcriptional regulatory protein SrrA	1	No	No	No	Yes	No
ssuD_3	Alkanesulfonate monooxygenase	1	No	No	No	Yes	No
stp_2	Multidrug resistance protein Stp	1	No	No	No	Yes	No
thrC_1	Threonine synthase	1	No	No	No	Yes	No
traC	DNA primase TraC	1	No	No	Yes	No	No
tsf_1	Elongation factor Ts	1	No	No	No	Yes	No
vapC2	Ribonuclease VapC2	1	No	No	Yes	No	No
vbhT	Adenosine monophosphate-protein transferase VbhT	1	No	No	Yes	No	No
vsr	Very short patch repair protein	1	No	No	No	No	Yes
wbiB_3	dTDP-L-rhamnose 4-epimerase	1	No	No	No	Yes	No
xerC_5	Tyrosine recombinase XerC	1	No	No	No	Yes	No
xerC_6	Tyrosine recombinase XerC	1	No	No	No	Yes	No
ybfF_1	Esterase YbfF	1	No	No	No	Yes	No
ybfF_2	Esterase YbfF	1	No	No	No	Yes	No
ybjJ_2	Inner membrane protein YbjJ	1	No	No	No	No	Yes
ydbD	putative manganese catalase	1	No	No	No	No	Yes
ydiO	putative BsuMI modification methylase subunit YdiO	1	No	No	No	No	Yes
yqjG_2	Glutathionyl-hydroquinone reductase YqjG	1	No	No	No	Yes	No
zitB	Zinc transporter ZitB	1	No	No	No	No	Yes
